1 ***Toxoplasma gondii* ROP18 Inhibits Human Glioblastoma Cell**  
2 **Apoptosis through Mitochondrial Pathway by Targeting Host**  
3 **Cell P2X1**

4 Li-Juan Zhou<sup>1</sup>, Min Chen<sup>1</sup>, Cheng He<sup>1</sup>, Jing Xia<sup>1</sup>, Cynthia Y. He<sup>2</sup>, Sheng-Qun Deng<sup>1</sup>,  
5 Hong-Juan Peng<sup>1</sup>

6 1 Department of Pathogen Biology, Guangdong Provincial Key Laboratory of  
7 Tropical Disease Research, School of Public Health, Southern Medical University,  
8 Guangzhou, Guangdong Province, 510515, P. R. China.

9 2 Department of Biological Sciences, National University of Singapore, Singapore,  
10 Singapore

11 Address correspondence to Hong-Juan Peng, [floriapeng@hotmail.com](mailto:floriapeng@hotmail.com)

12 **ABSTRACT**

13 It is known that *Toxoplasma gondii* infection both initiates and inhibits host cell  
14 apoptosis through different proapoptotic signaling cascades, but the parasitic factors  
15 involved in these processes remain unclear. *T. gondii* virulence factor ROP18 has  
16 been reported to regulate host cell apoptosis, but the results of this regulation are few  
17 reported and contradictory. In this study, we found that immune or neuro cells  
18 infected by any one of the *T. gondii* strains (RH-type I, ME49-type II, and VEG-type  
19 III) showed a significantly lower apoptosis index than their uninfected controls when  
20 apoptosis was induced by staurosporine (STS). We further found that ROP18 of RH  
21 strain inhibited ATP induced apoptosis in human glioblastoma cells (SF268) with  
22 endogenous expression of human proapoptotic protein purinergic receptor 1 (P2X1),  
23 but had no effects on the immune cells of RAW264.7 and THP-1 without detectable  
24 P2X1 expression, which may indicate that ROP18's inhibition of host cell apoptosis is  
25 related to P2X1. Interestingly, we further identified that ROP18 (RH strain) interacted  
26 with P2X1, and over-expression of ROP18 in COS-7 cells inhibited the cell apoptosis  
27 mediated by P2X1. We also found that ROP18 of RH strain inhibited P2X1-mediated  
28 Ca<sup>2+</sup> influx, translocation of cytochrome C from mitochondria to cytoplasm, and

29 ATP-triggered caspases activation. Collectively, these findings supported that ROP18  
30 inhibited the host cell apoptosis through the intrinsic mitochondria pathway by  
31 targeting host cell P2X1, thereby suggesting a sensor role of the host proapoptotic  
32 protein P2X1 in this process

### 33 **Author summary**

34 The obligate intracellular protozoan *Toxoplasma gondii* has been shown to modulate  
35 cell apoptosis through different apoptotic pathways. However, the consequences are  
36 various and even contradictory, and the parasite effectors and the precise biological  
37 mechanisms remain unclear. Herein we showed that *T. gondii* of type I, II, and III  
38 strains could inhibit the apoptosis of neuro cells and immune cells. *Toxoplasma*  
39 *gondii* ROP18 (RH strain) inhibited apoptosis of human glioblastoma cell SF268 by  
40 targeting C terminal of host cell P2X1 protein, but not through proteasome-dependent  
41 degradation of P2X1.

### 42 **Introduction**

43 *Toxoplasma gondii*, an obligate intracellular protozoan, infects the nucleated cells of  
44 all warm-blooded animals including humans [1]. *T. gondii* infection shows no or mild  
45 symptoms in immune competent hosts, but the symptoms may be severe in  
46 immunocompromised patients presenting with all types of toxoplasmosis, or in case  
47 of primary infection during pregnancy which may be vertically transmitted to fetus  
48 leading to fetus deformity, abortion or newborn's toxoplasmosis [2]. *T. gondii* strains  
49 are categorized into highly virulent type I, and non-virulent types II and III based on  
50 their acute virulence in mouse model [3]. The lethal dose (LD) of type I strain (RH) is  
51 one parasite, while the median lethal dose (LD50) of nonvirulent types II and III  
52 strains (PLK and CEP) is more than 100 parasites [4].

53 Apoptosis, known as type I programmed cell death, is a biological event  
54 induced by various physiological or pathological stimuli and then processed by  
55 activation of a series of protein cleavage enzymes known as caspases [5].  
56 Staurosporine (STS) is a protein kinase C (PKC) inhibitor, which has been used in the  
57 induction of cell apoptosis dependent on p38 MAPK pathway [6]. As an apoptosis

58 inducer, STS induces cell apoptosis via elevating the cytosolic ATP level [7].  
59 Adenosine triphosphate (ATP) is regarded as an energy storage in vivo and  
60 neurotransmitter in the nervous system, and extracellular ATP can induce SH-SY5Y  
61 cells apoptosis through decreasing the expression of anti-apoptotic protein Bcl2 and  
62 increasing the expression of proapoptotic protein Bax [8].

63 *T. gondii* is reported to both promote and inhibit host cell apoptosis, these  
64 opposing effects might involve complicated factors that modulate the exquisitely  
65 balanced interaction between the parasite and the pro- and anti-apoptotic signals of  
66 the host, such as the cell type, the virulence of *T. gondii* and so on [9]. For example,  
67 tachyzoites of the RH strain promotes the apoptosis of mouse neural stem cells [10],  
68 but inhibits the apoptosis of human leukemic cells THP-1 and Jurkat cells [11,12].  
69 Apoptosis of trophoblast cells can be induced by ME49 infection but inhibited by RH  
70 infection [13]. Meanwhile, the major virulence factor ROP18 of *T. gondii* was also  
71 reported to induce the apoptosis of mouse neural cells N2a [14], and to suppress  
72 apoptosis in human epithelial cell 293T [15].

73 Human purinergic receptor 1 (P2X1) is an ATP-gated ion channel formed with  
74 trimeric assembly of the subunits with two transmembrane regions, the intracellular  
75 amine and carboxyl termini and a large extracellular ligand binding loop [16]. P2X1  
76 receptors have a conserved intracellular serine/threonine PKC (protein kinase C) site,  
77 which functions in its potentiation through phosphorylation of an interacting  
78 regulatory protein diacylglycerol (DAG) generated by G-protein-coupled receptors  
79 [17,18]. Immunohistochemistry and functional studies have shown that P2X1 is  
80 expressed predominantly on smooth muscle cells, blood cells and neurons cells  
81 [19-21]. P2X1 activation results in Na<sup>+</sup> and Ca<sup>2+</sup> influx and K<sup>+</sup> efflux across the cell  
82 membrane, which leads to depolarization of the plasma membrane and an increase of  
83 the intracellular Na<sup>+</sup> and Ca<sup>2+</sup> concentration [21] P2X1 abnormality is implicated in  
84 many diseases. For instance, the accumulation of alpha-synuclein in susceptible  
85 neurons through P2X1 mediated lysosomal dysfunction may account for Parkinson's  
86 disease [19]. P2X1 is activated in the motoneurons in nerve injury [22]. Male

87 infertility occurs in P2X1 knockout mice [23]. The cell apoptosis rate is increased in  
88 cells over-expressing P2X1, which indicates P2X1 is a proapoptotic protein[24].

89 In this study, we found *T. gondii* infection inhibited host cell apoptosis induced by  
90 STS regardless of strain virulence, *T. gondii* ROP18 targeted host cell P2X1 and  
91 inhibited ATP stimulated cell apoptosis through mitochondria pathway.

## 92 **Results**

### 93 **1-Infection of the three types of *T. gondii* strains (RH, ME49, VEG) inhibits the** 94 **host cell apoptosis induced by staurosporine**

95 Human glioblastoma cells (SF268) were infected with *T. gondii* strains RH,  
96 ME49 or VEG for 2hrs and 22hrs respectively. After infection, the control and  
97 infected groups were then treated by staurosporine (STS) for 4hrs and 6hrs  
98 respectively to induce apoptosis. Our flow cytometry (FCM) results indicated that the  
99 apoptosis indices in SF268 cells infected by different strains of *T. gondii* were  
100 significantly lower than which in the uninfected control, at both 6hrs and 28hrs post  
101 infection (PI) (Figure 1A&C). DNA fragmentation was not detected in both infected  
102 or uninfected SF268 cells after induction with STS (data not shown).

103 Meanwhile, the other two types of cells, human monocyte/macrophage cells  
104 (THP-1) and murine macrophage cells (RAW264.7) were also used in our experiment  
105 to show the host cell apoptosis modulated by different types of *T. gondii* infection  
106 after STS induction for apoptosis. The same results were observed as in the SF268  
107 cells (Figure S1 A&B and Figure S2 A&B). Detection of DNA fragmentation in  
108 THP-1 cells and RAW264.7 cells also showed that the relative abundance of small  
109 DNA fragments was less evident in RH, ME49 or VEG infected groups compared to  
110 their uninfected controls after induction with STS (Figure S1 C, Figure S2 C).

111 These results suggested that STS-induced cell apoptosis in human SF268,  
112 THP-1 and mouse RAW264.7 cells were significantly inhibited by *T. gondii* infection  
113 regardless of strain types, at both 6hrs and 28hrs PI.

### 114 **2-TgROP18 is a regulator for suppression of ATP induced apoptosis in SF268** 115 **cells.**

116           Based on previous literature review, we found that *TgROP18* of RH strain  
117 modulated host cell apoptosis, but the modulation results were related to the types of  
118 cells they infected. To find out whether the apoptosis of SF268, THP-1 and  
119 RAW264.7 cells were influenced by *TgROP18*, the cells of SF268, THP-1 and  
120 RAW264.7 were infected with RH- $\Delta rop18$  or RH wild type tachyzoites at multiplicity  
121 of infection (MOI) of 13 (MOI=13) for 12hrs followed by ATP induction for 12hrs to  
122 induce apoptosis. The normal and ATP treated cells were used as negative and  
123 positive control, respectively. Our flow cytometry (FCM) results showed that the  
124 apoptosis rate of RH infected SF268 cells was (4.8±0.74) %, which was significantly  
125 lower ( $P < 0.01$ ) than which of (11. 8±1.34) % in the RH- $\Delta rop18$  infected SF268  
126 group (Figure2A&B). While this phenomenon was not observed in THP-1 and  
127 RAW264.7 cells, both the RH and RH- $\Delta rop18$  infected groups showed lower  
128 apoptosis rate when compared to the ATP treated group, but no significant difference  
129 was observed between the RH and RH- $\Delta rop18$  infected groups (Figure S3 A&B).  
130 These results indicated that *TgROP18* played no observable role in modulating the  
131 apoptosis of THP-1 and RAW264.7 cells, while apparently inhibited the apoptosis of  
132 SF268 cells.

### 133 **3-*TgROP18* targeted host cell protein P2X1.**

134           To understand the molecular mechanism of *TgROP18* inhibiting cell apoptosis  
135 and find its targets in host cells, we applied a genome wide screening of human  
136 targets for *TgROP18* of RH strain with a Bi-molecular fluorescence complementation  
137 (BiFc) technique [25]. P2X1 was identified as a putative interacting partner of  
138 *TgROP18*. Our fluorescence resonance energy transfer (FRET) experiment further  
139 confirmed the interaction of *TgROP18* with P2X1 in the cytoplasm (Figure 3 A&B).  
140 To further assess the specificity of this interaction, we over-expressed flag-tagged  
141 *TgROP18* together with HA-tagged P2X1 in COS-7 cells or infected SF268 cells with  
142 RH-ROP18-eGFP-Flag strain. The cell lysates were subjected to immunoprecipitation  
143 assay using an anti-HA antibody or anti-Flag antibody. The results indicated that not  
144 only the overexpressed Flag-tagged *TgROP18* was immunoprecipitated by the

145 overexpressed HA-tagged P2X1 (Figure 3C), but also the endogenous P2X1 from  
146 SF268 cells could be immunoprecipitated by endogenous *TgROP18* tagged with Flag  
147 from RH-ROP18-eGFP-Flag strain (Figure 3D).

148 Previous studies have shown that the C terminus of P2X1 receptor plays an  
149 important role in the regulation of its expression and gating activity [17]. To  
150 understand whether this domain was involved in binding with *TgROP18*, we  
151 constructed a pcDNA-P2X1-HA plasmid with P2X1 C terminus (amino acids  
152 339-399) deletion and co-transfected it with pcDNA-ROP18<sub>1-3</sub>×Flag into COS-7  
153 cells. The results showed that Flag-tagged *TgROP18* could not be immunoprecipitated  
154 by HA-tagged P2X1 with C terminal deletion when compared with the HA-tagged  
155 full-length P2X1 which was used as a positive control (Figure 3E).

#### 156 **4-*TgROP18* inhibited the P2X1-mediated apoptosis**

157 To further identify if *TgROP18* inhibited host cell apoptosis through binding  
158 with host cell protein P2X1, *TgROP18* and/or P2X1 were over-expressed in COS7  
159 cells for 48 hrs and stimulated with ATP for 24hrs. Cell apoptosis was then assessed  
160 with Annexin V/PI staining. Our results showed that over-expression of *TgROP18* in  
161 COS7 cells significantly inhibited ATP-induced apoptosis (which was mediated by  
162 P2X1) when compared with the ATP treated cells (Figure 4 A&C).

163 When SF268 cells were pretreated with 4μM P2X1 specific inhibitor NF449 for  
164 2hrs before ATP induction, the apoptosis rate in NF449+ATP treated group was  
165 significantly lower than which in ATP treated group, indicating that P2X1 was truly  
166 involved in the apoptosis induced by ATP, and functioned as a promoter for cell  
167 apoptosis (Figure 4D). On the other hand, we found the apoptosis index in  
168 NF449+ATP treated group was significantly higher than which in NF449 treated  
169 group, though both of the apoptosis indices in these two groups were significantly  
170 lower than which in ATP treated group. These results suggested that P2X1 inhibitor  
171 NF449 could not completely inhibit the apoptosis induced by ATP, and there  
172 probably existed some other proapoptotic proteins regulating on SF268 apoptosis  
173 induced by ATP besides P2X1.

174 **5-*TgROP18* inhibited host cell apoptosis through inhibition of P2X1-mediated**  
175 **Ca<sup>2+</sup> influx but not through P2X1 degradation despite of their interaction.**

176 *TgROP18* and P2X1 were over-expressed in COS7 cells for 72h, and the intracellular  
177 Ca<sup>2+</sup> concentration was measured for 600s following addition of 60 µg/ml ATP into  
178 the culture medium. We found that P2X1 increased Ca<sup>2+</sup> influx after ATP stimulation,  
179 and this process can be inhibited by over-expression of ROP18 of RH strain in the  
180 cells (Figure 5A&C). As a member of kinase family functioning in protein  
181 degradation, we next examined if ROP18 resulted in P2X1 degradation. We  
182 co-transfected pcDNA3.1(+)-ROP18-Flag of an increasing amount (0, 0.5, 1.0, 2.0  
183 µg) with 2µg pcDNA3.1(+)-P2X1-HA into COS-7 cells for 48h. Our western blotting  
184 results showed that ROP18 expression did not affect the protein level of P2X1 (Figure  
185 5 C). All these evidences showed that ROP18 inhibited P2X1-mediated Ca<sup>2+</sup> influx,  
186 as a result to inhibit cell apoptosis, but not through P2X1 degradation despite of their  
187 interaction.

188 **6- *TgROP18* inhibited the depolarization of mitochondrion membrane and Cyt C**  
189 **translocation from mitochondria to cytoplasm in SF268 cells**

190 Previous studies have shown that RH regulate the apoptosis of host cells mainly  
191 through mitochondrial pathway [26]. To identify whether this pathway was modulated  
192 by *TgROP18* in *T. gondii* infection, we firstly detected the mitochondrial membrane  
193 depolarization after the SF268 cells were infected by RH or RH- $\Delta rop18$  strains for  
194 12hrs followed by ATP treatment for 12hrs. Both of our fluorescence microscope  
195 observation (Figure 6 A&B) and flow cytometry study (Figure 6 C&D) showed the  
196 intensity ratio of green fluorescence to red fluorescence was decreased in RH+ATP  
197 treated group when compared with ATP treated group, indicating that infection of RH  
198 strain inhibited mitochondrial membrane depolarization induced by ATP; Further, the  
199 intensity ratio of green fluorescence to red fluorescence was decreased in RH+ATP  
200 treatment group when compared with RH- $\Delta rop18$  +ATP treatment group, implying  
201 that the depolarization of mitochondrion membrane was inhibited by *TgROP18*.

202 Mitochondrial protein Cytochrome C (Cyt C) plays an important role in  
203 initiating the intrinsic apoptosis pathway. To evaluate the apoptotic result mediated by  
204 *TgROP18*, we next detected the situation of cytochrome c (Cyt C) release from the  
205 mitochondria into the cytosol and the translocation of Bax (a proapoptotic Bcl2 family  
206 protein) and Bcl2 (an antiapoptotic Bcl2 family protein) from the cytosol to the  
207 mitochondria in each group. In our western blotting results, relatively higher level of  
208 Cyt C was detected in the mitochondrial fraction, but lower level of Cyt C was  
209 detected in the cytosolic fraction in RH+ATP treatment group compared to which in  
210 RH- $\Delta rop18$ +ATP treatment group ( $P < 0.01$ ) (Figure 7 A, C1&C2). This result  
211 indicated that *TgROP18* inhibited the cytochrome C translocation from mitochondria  
212 to cytoplasm.

213 Meanwhile, increased level of antiapoptotic protein Bcl2 and decreased level of  
214 proapoptotic protein Bax was found in the mitochondrial fraction of RH+ATP treated  
215 group compared to the ATP treated group ( $P < 0.01$ ) (Figure 7 B, C3&C4), indicating  
216 that RH infection promoted the translocation of Bcl2 and inhibited the translocation of  
217 Bax from cytoplasm to mitochondria in SF268 cells. While the protein levels of  
218 mitochondrial Bax and Bcl2 were found both markedly higher in RH+ATP treated  
219 group than which in RH- $\Delta rop18$ +ATP treated group ( $P < 0.01$ ) (Figure 7 B, C3&C4).  
220 Further, we found that the Bcl2/Bax ratio in mitochondrial fraction was significantly  
221 higher in the RH+ATP group than which in the RH- $\Delta rop18$ +ATP group ( $P < 0.01$ )  
222 (Figure 7 C 5). These results suggested that though ROP18 promoted the translocation  
223 of both antiapoptotic protein Bcl2 and proapoptotic proteins Bax from cytoplasm to  
224 mitochondria, the ratio of Bcl2 to Bax in mitochondrial fraction was significantly  
225 increased by ROP18. As a result, the cell apoptosis was significantly inhibited by  
226 ROP18. Cytochrome C oxidase (COX) IV and actin were detected as the loading  
227 control for the mitochondrial fraction and the cytosolic fraction, respectively.

### 228 **7-*TgROP18* inhibited ATP-triggered caspases activation.**

229 The mitochondrial apoptotic pathway mostly depends on caspase-9, which in  
230 turn activates the executioner caspases-3 and caspases-7 [27]. Our immunoblotting



231 results indicated that in ATP treated SF268 cells, inactive full-length caspase-9 was  
232 cleaved into the active p35 and p37 fragments, inactive full-length caspase-7 was  
233 cleaved into active p20 fragments, and inactive full-length caspase-3 was split into  
234 p17 fragments. In SF268 cells treated with RH+ATP but not RH- $\Delta rop18$ +ATP,  
235 significant inhibition of procaspase-9, procaspase-7 and procaspase-3 processing and  
236 activation to caspase-9, caspase-3 and caspase-7 was observed. Whereas no  
237 significant difference was detected in the levels of cleaved PARP (Poly ADP-ribose  
238 polymerase) between the ATP treated group and RH+ATP group (Figure 8).

239

## 240 Discussion

241 *Toxoplasma gondii* has a preference to infect the immune cells, hidden inside  
242 the immune cells, can it move across blood-brain barrier (BBB), then infects  
243 astrocytes and neurons [28]. Astrocytes can clear intracellular parasites through  
244 multiple mechanisms, while *T. gondii* can easily survive in neuro cells which lack full  
245 immune response capabilities [29]. Although it has been well accepted that *T. gondii*  
246 modulates host cell apoptosis during infection, it was still unclear whether this  
247 modulation was related to the strain virulence or not. Based on previously reported  
248 literatures, we found the apoptosis direction regulated by type I strain RH and type II  
249 strain (NTE or ME49) in immune cells or neuro cells were varied (supplementary  
250 table S1). Therefore, we need to learn more about the host cell apoptosis resulted by  
251 infection of different types of *T. gondii*. We demonstrated in our research, when  
252 human glioblastoma cells (SF268), human monocyte/macrophage cells (THP-1) and  
253 murine macrophage cells (RAW264.7) were infected by RH, ME49 and VEG strains  
254 respectively for 6h or 28h, all of them showed a lower apoptosis rate compared to  
255 their uninfected controls, when cell apoptosis was induced by staurosporine (STS).

256 It has been reported that overexpression of TgROP18 significantly suppresses  
257 human embryo kidney epithelial cell 293T apoptosis induced by Actinomycin D at  
258 48hrs post transfection [15], and TgROP18 targets P53 for degradation to inhibit host  
259 cell apoptosis [30]. On the contrary, TgROP18 is also reported to induce the apoptosis

260 of murine neuroblastoma N2a cells through the endoplasmic reticulum  
261 stress-mediated apoptosis pathway at 24hrs post infection [14]. In our research, we  
262 identified that *TgROP18* significantly inhibited the apoptosis of SF268 cells induced  
263 by ATP when using RH and RH- $\Delta rop18$  strains in infection, but strangely this  
264 phenomenon was not seen in THP-1 and RAW264.7 cells. We further found that  
265 ROP18 interacted with human P2X1 which was endogenously expressed in SF268  
266 cells but not in THP-1 and RAW264.7 cells (data were not shown). Probably it was  
267 the reason why ROP18 could inhibit the apoptosis induced by ATP through binding  
268 with P2X1 in SF268 cells, but not in THP-1 and RAW264.7 cells without P2X1  
269 expression.

270 It has been known that RAW264.7 cell apoptosis can be induced by activation  
271 of protein kinase (ERK) and MAPK pathway regulated by extracellular signals  
272 through P2X4 as well as P2X7 receptors [31]; THP-1 cell apoptosis can be promoted  
273 via increase of intracellular calcium through P2X7 receptor [32]. Therefore, it seemed  
274 that ROP18 can only target at P2X1 but not P2X4 or P2X7 to regulate host cell  
275 apoptosis.

276 Owing to the insertion of a 2.1kb sequence in the promoter region of type III  
277 strains, ROP18 expression can nearly detected [33]. Whereas, we found in our study  
278 that type III strain VEG could also inhibited host cell apoptosis. It has been reported  
279 that ROP38, another member of rhoptry protein kinase (ROPK), is normally  
280 undetectable in virulent RH strain but is abundant in the avirulent VEG strain at the  
281 transcription level, and expression of ROP38 exerts a potent effect on the regulation  
282 of cell differentiation and apoptosis through mitogen-activated protein kinase (MAPK)  
283 pathway [34].

284 In our research, we identified that *TgROP18* inhibited the apoptosis of SF268  
285 cells through inhibition of mitochondria depolarization, translocation of Cyt C from  
286 mitochondria to cytoplasm, and ATP-triggered caspases activation. Cyt C is present in  
287 the mitochondrial inner membrane (MIM) media and plays a crucial role in  
288 transferring electrons [35]. Apoptotic signals such as DNA damage and nutrient

289 deprivation increase the permeabilization of the MIM, and Cyt C will be released  
290 from the MIM media to the cytosol [36]. Cyt C in cytosol binds to apoptotic protease  
291 activating factor-1 (APaf-1) and forms a heptameric apoptosome complex to activate  
292 procaspase-9 to be cleaved to caspase-9, the activated caspase-9 stimulates the  
293 subsequent effectors caspase-3 and caspase-7 that eventually cause cell apoptosis  
294 [37,38]. Poly (ADP-ribose) polymerases (PARPs) are an important family of  
295 nucleoproteins which are mostly present in the nucleus and less in the cytosol. It is  
296 composed of three functional domains, namely central auto-modification domain,  
297 C-terminal catalytic domain and N-terminal DNA binding domain which assists in  
298 binding to both single-and double-stranded breaks in DNA for DNA repair [39,40]. In  
299 our study, pro-PARP can be activated into cleaved PARP when SF268 cells was  
300 treated by ATP for 12hrs. Activated PARP can repair damage DNA, that is why no  
301 DNA fragmentation was detected in in both infected or uninfected SF268 cells after  
302 induction with STS (data not shown)

303 The Bcl-2 family is classified into three groups according to their function in  
304 apoptosis and the number of Bcl-2 homology (BH) domains they possess. The  
305 anti-apoptotic Bcl-2 proteins and the proapoptotic proteins, Bax and Bak, all contain  
306 four BH domains BH1-BH4 [41]. In normal cells, Bcl-2 and Bax are located  
307 predominantly in the cytosol [42], but under apoptotic conditions, they will  
308 accumulate at the mitochondrial outer membrane [41,43]. Whether Cyt C is released  
309 into the cytosol partly depends on the ratio of Bcl2/Bax [44]. Our immunoblotting  
310 results showed that *TgROP18* increased the ratio of Bcl2/Bax in the mitochondria,  
311 and then inhibited the translocation of Cyt C from the mitochondria to the cytoplasm.

312 In conclusion, this study identified that RH, ME49 and VEG infection  
313 inhibited the apoptosis of SF268, RAW264.7 and THP-1 cells when induced by STS.  
314 *TgROP18* targeted C terminus of P2X1 and inhibit the apoptosis mediated by P2X1 in  
315 SF268 cells with P2X1 endogenous expression. When the cell apoptosis was induced  
316 by ATP, *TgROP18* overexpression inhibited Ca<sup>2+</sup> influx from the extracellular space  
317 to the cytoplasm in COS7 cells overexpressing P2X1. Furthermore, *TgROP18*

318 inhibited depolarization of mitochondrion membrane, Cyt C translocation from  
319 mitochondria to cytoplasm, and ATP-triggered caspase 9,7, and 3 activation in SF268  
320 cells. All these findings supported that *TgROP18* targeted host cell P2X1 and  
321 inhibited the cell apoptosis induced by ATP through the mitochondria pathway.

322

## 323 **Materials and methods**

### 324 **Reagents:**

325 Apoptosis inducer: staurosporine (STS; S1421, Selleck, China), adenosine  
326 triphosphate (ATP) (A7699, Sigma-Aldrich, USA). Antagonist of P2X1:  
327 NF449(1391, TORICS, North America). Apoptosis detection: Annexin V-FITC  
328 apoptosis detection kit (KGA105-KGA108, KeyGen, China), JC-1 mitochondria  
329 membrane potential detection kit (KGA601-KGA604, KeyGen, China), Fluo-4 AM  
330 (Dojindo Laboratories, Japan). Cell Mitochondria Isolation Kit (C3601, Beyotime  
331 Biotechnology, China). Transfection reagents: Lipofectamine<sup>®</sup> 3000 transfection kit  
332 (L3000015, Thermo Fisher Scientific, USA). Antibodies: Protein A-Agarose  
333 Immunoprecipitation Reagent (sc-2001) and normal rabbit IgG (sc-2028) were  
334 purchased from Santa Cruz Biotechnology; DDDDK-Tag Mouse mAb (AE005) was  
335 purchased from Abclonal. HA-Tag rabbit mAb (3724S), HA-Tag mouse mAb (2367),  
336  $\beta$ -Actin rabbit mAb (13E5), caspase-3 rabbit mAb (9662), caspase-7 rabbit mAb  
337 (D2Q3L), caspase-9 rabbit mAb (9502), PARP rabbit mAb (9542) were all purchased  
338 from Cell Signaling Technology. Bax rabbit mAb (ab32503), Bcl2 rabbit mAb  
339 (ab32124), cytochrome C rabbit mAb (ab133504), P2X1 rabbit pAb (ab74053) and  
340 COXIV rabbit mAb (ab202554) were all obtained from Abcam.

### 341 **Cell culture**

342 Human monocyte/macrophage cell line THP-1 (ATCC: American Type Culture  
343 Collection, USA) and Human glioblastoma cell line SF268 (ATCC) were propagated  
344 in RPMI 1640 (Thermo Fisher Scientific) supplemented with 10% (v/v) fetal bovine  
345 serum (Gibco, Australia), 100 U/mL penicillin and 100  $\mu$ g/mL streptomycin at 37 °C  
346 and 5% CO<sub>2</sub>. Mouse monocyte/macrophag cell line RAW264.7 (ATCC),

347 *Cercopithecus aethiops* kidney fibroblast cell line COS7 (ATCC), and human  
348 foreskin fibroblast cell line HFF(ATCC) were all cultured in DMEM supplemented  
349 with 10% (v/v) fetal bovine serum (Gibco, Australia), 100U/mL penicillin and 100  
350 µg/mL streptomycin at 37 °C and 5% CO<sub>2</sub>.

### 351 ***T. gondii* culture, cell infection and induction of apoptosis**

352 Type I strain RH, RH- $\Delta rop18$ , RH-ROP18-eGFP-Flag, type II strain ME49 and  
353 type III strain VEG were cultured in HFFs in DMEM (Thermo Fisher Scientific)  
354 supplemented with 1% (v/v) FBS (Gibco, Australia), 100 U/ml penicillin, and  
355 100µg/ml streptomycin (Invitrogen) at 37 °C and 5% CO<sub>2</sub>. At 3-5 days, when most of  
356 the cells were ready to be ruptured by the tachyzoites. The cells were scraped and  
357 harvested to pass through a syringe for multiple times. The tachyzoites were then  
358 purified by passing through a 3-µm filter (Whatman, England), then pelleted at 2500g  
359 for 10min and resuspended in DMEM medium. The tachyzoites were counted with  
360 hemocytometer.

361 Before infection, THP-1 were cultured in the presence of 100 ng/ml phorbol  
362 12-myristate 13-acetate (PMA) (ab120297, Abcam, England) for 24 h for  
363 differentiation into macrophages as described previously [45]. THP-1, RAW264.7 and  
364 SF268 cells were infected with RH, ME49 and VEG at multiplicity of infection  
365 (MOI) of 3 and incubated for 2 h or 22 h at 37°C in 5% CO<sub>2</sub>. Before apoptosis  
366 induction, cells were washed with PBS to remove non-adherent parasites, then, THP-1  
367 cells were treated with 2µM STS, SF268 cells were treated with 350nM STS and  
368 RAW264.7 cells were treated with 250nM STS for 4 h or 6 h, Then, The apoptotic  
369 level of the cells was analyzed with AnnexinV-FITC/PI and DNA fragmentation.

370 RH-wild type and RH- $\Delta rop18$  tachyzoites were separated from the host cells by  
371 centrifugation, and SF268, THP-1, RAW264.7 cells were infected with the  
372 tachyzoites (MOI =13). The cells were washed with PBS at 12 h post infection. and  
373 then the cells were treated with 1mg/ml adenosine triphosphate (ATP) for an  
374 additional 12 h to induce apoptosis. The apoptotic level of the cells was analyzed with  
375 AnnexinV-FITC/PI.

### 376 **Flow cytometry detection of apoptosis with Annexin V-FITC/PI**

377 The apoptotic levels of RAW264.7, THP-1 and SF268 cells were determined  
378 with isothiocyanate (FITC)-Annexin V/propidium iodide (PI) kit (KeyGen, China).  
379 Cells were briefly digested with 0.25% trypsin (Thermo Fisher Scientific, USA) and  
380 washed twice with cold PBS, then resuspended in 500  $\mu$ L binding buffer, 5  $\mu$ L  
381 FITC-conjugated Annexin V and 5  $\mu$ l propidium iodide (PI) were added to the  
382 suspension and incubated at room temperature for 15 min in the dark. The flow  
383 cytometer (BD FACSCalibur, USA) was used for data collection, FlowJo software  
384 was used for data analysis. According to the kit manual, Annexin V-FITC<sup>+</sup>/PI<sup>-</sup> cells  
385 represent the early apoptotic cells, and AnnexinV- FITC<sup>+</sup>/PI<sup>+</sup> cells are the late  
386 apoptotic cells [46,47].

### 387 **DNA fragmentation detection**

388 The extraction of DNA fragments followed the previous reported processes  
389 [48]. Cells were briefly digested with 0.25% trypsin and washed twice with pre-cold  
390 PBS. DMSO was added to the cell pellet and immediately vortexed, then, an equal  
391 volume of TE buffer (pH7.4) with 2% SDS was added to the cell suspension followed  
392 by vortexing. The solution was centrifuged at 12000 g at 4°C for 10 min and 30 $\mu$ l  
393 supernatant was loaded on agarose gels for electrophoresis.

### 394 **Fluorescence resonance energy transfer (FRET) experiment**

395 COS7 cells were cultured in plates the day before transfection.  
396 pECFP-N1-ROP18<sub>i</sub> and pEYFP-C1-P2X1 were co-transfected for the experimental  
397 group. pECFP-N1 and pEYFP-C1 were co-transfected as a negative control and  
398 pEYFP-CFP was transfected as a positive control [49]. Forty-eight hours post  
399 transfection, the cells were fixed in 4% paraformaldehyde at 37°C for 30 minutes and  
400 then washed twice with PBS. The FRET efficiency of different transfection groups  
401 were measured under a confocal laser scanning microscope (Olympus FLUOVIEW  
402 FV1000) [50].

### 403 **CO-Immunoprecipitation analysis**

404 SF268 and COS-7 cells were grown in T75 flasks to 100% confluence. SF268

405 cells were infected with RH-ROP18-eGFP-Flag strain or not for 36 h. COS-7 cells  
406 were transfected with pcDNA3.1(+)-ROP18-3×Flag and/or pcDNA3.1(+)-P2X1-HA  
407 or with pcDNA3.1(+)-ROP18-3×Flag and/or pcDNA3.1(+)-P2X1 $\Delta$ 339-399-HA for  
408 48h. The cells were washed with PBS for 3 times and lysed using cell lysis buffer  
409 (P0013, Beyotime, Shanghai, China) with 1 mM phenylmethanesulfonyl fluoride  
410 (WB-0181, Beijing Dingguo Changsheng Biotechnology, Beijing, China). Cell lysates  
411 were centrifuged at 14,000 g for 10 min at 4 °C. The supernatants were harvested and  
412 incubated with the primary antibody anti-HA antibody (3724S, CST), Monoclonal  
413 anti-FLAG antibody (F1804, Sigma Aldrich) or rabbit normal IgG for 2h at 4 °C with  
414 gentle rotation. Then Protein A-Agarose (Santa Cruz) was added to the mix and  
415 incubated overnight at 4°C with gentle rotation. Beads were collected by  
416 centrifugation at 500 g for 5 min at 4°C, and then resuspended in SDS-PAGE sample  
417 buffer. The samples were boiled and loaded to the gels for SDS-PAGE, and then  
418 analyzed by WB [51].

#### 419 **ROP18 inhibited host cell apoptosis mediated by P2X1**

420 COS-7 cells were transfected with pcDNA3.1(+)-ROP18-3×Flag and/or  
421 pcDNA3.1(+)-P2X1-HA. At 48 hours PI, the cells were treated with 60 $\mu$ g/ml ATP for  
422 24h to induce cell apoptosis or not induced for control. SF268 cells were treated with  
423 4 $\mu$ M NF449 (P2X1 receptor antagonist) for 2hrs or not treated, then subjected to  
424 1mg/ml ATP treatment for 12hrs. The normal control cells were treated with neither  
425 NF449 nor ATP. The apoptosis rate of the cells was analyzed with  
426 AnnexinV-FITC/PI.

#### 427 **Detection of Calcium influx with Fluo-4 AM**

428 COS7 cells were grown in 24-well plates and co-transfected with  
429 pcDNA3.1(+)-ROP18-Flag and/or pcDNA3.1(+)-P2X1-HA plasmids for 72h. The  
430 cells were then harvested and washed twice with Hank's Balanced Salt Solution  
431 (HBSS) (Invitrogen). Two hundred and fifty  $\mu$ L of 5  $\mu$ M Fluo-4 AM (Dojindo  
432 Laboratories, Japan) (an indicator of intracellular calcium ions) was added to the cells  
433 and incubated for 30 min at 37 °C. After being washed twice with HBSS, the cells

434 were analyzed with flow cytometry. Fluo-4 AM is virtually non-fluorescent,  
435 acetoxymethyl (AM) ester moiety allows this dye to cross the cell membrane,  
436 whereupon endogenous esterases cleave the AM group to liberate the active dye and  
437  $\text{Ca}^{2+}$  can bind with Fluo-4 intracellularly to emit green fluorescence. Time series  
438 reads were taken every 2 seconds for 100s and the mean value was calculated as the  
439 baseline read (F0). Following 60 $\mu\text{g}/\text{ml}$  ATP stimulation, the Green fluorescence  
440 intensity reflecting the free intracellular calcium ions level in each group was  
441 recorded for 500s with flow cytometry. The intracellular calcium level was quantified  
442 by the ratio of strongest signal fluorescence signal to the basal signal (F/F0).

#### 443 **Detection of mitochondrial membrane depolarization with JC-1 staining**

444 SF268 cells were infected with RH or  $\Delta\text{ROP18}$ -RH tachyzoites (MOI=13).  
445 Twelve hours later, 1 mg/ml ATP was added to the cells to induce apoptosis for 12 h.  
446 Cells were then digested with 0.25% trypsin and rinsed with PBS twice. Five hundred  
447 micro liters of incubation buffer containing 1  $\mu\text{L}$  of JC-1 was added to the cells and  
448 incubated for 15 min at 37 $^{\circ}\text{C}$  in 5%  $\text{CO}_2$ . The cells were pelleted and washed with  
449 1 $\times$ incubation buffer twice, the cells then were visualized under a fluorescence  
450 microscope (Nikon, Japan) and flow cytometry (BD Biosciences, USA). For  
451 fluorescence microscope with excitation at 550 nm and emission at 600 nm for red  
452 fluorescence and excitation at 485 nm and emission at 535 nm for green fluorescence.  
453 For flow cytometry, JC-1 was excited with the 488 nm argon laser, and JC-1 green  
454 and red fluorescence were recorded on FL1 and FL2 channels. A minimum of 10000  
455 cells within the gated region were analyzed. The value was calculated by the ratio of  
456 green fluorescence to red fluorescence. The lipophilic, cationic dye JC-1 staining can  
457 discriminate polarized and depolarized mitochondria because in polarized  
458 mitochondria the normal green fluorescent JC-1 dye forms red fluorescent aggregates  
459 in response to their higher membrane potential, while in depolarized mitochondria,  
460 the red fluorescent aggregates convert to monomeric form and exhibit green  
461 fluorescence [52].

#### 462 **Separation of cytosolic proteins and mitochondrial protein in SF268 cells**



463 The isolation of mitochondrial protein and cytosol proteins were performed  
464 using the Cell Mitochondria Isolation Kit. SF268 cells were harvested and washed  
465 twice with cold PBS, and then incubated in 100  $\mu$ L ice-cold mitochondrial lysis buffer  
466 with gentle rotation at 4  $^{\circ}$ C for 15 min. Cell suspension was then transferred into a  
467 glass homogenizer and homogenized for 30 strokes using a tight pestle on ice. The  
468 homogenate was subjected to centrifuging at 600  $g$  for 10 min at 4  $^{\circ}$ C to remove  
469 nuclei and unbroken cells. Then, the supernatant was collected and centrifuged again  
470 at 12,000  $g$  for 10 min at 4  $^{\circ}$ C to obtain the cytosolic (supernatant) and mitochondrial  
471 (deposition) fraction. Proteins of Cyt C, Bcl2 and Bax in the cytosol and mitochondria  
472 were detected by western blotting. The intensity of Cyt C, Bcl2 and Bax bands with  
473 non-saturated exposure from three independent experiments were analyzed using  
474 Image J software, and the proportion of Cyt C, Bcl2 and Bax to the loading control  
475 Actin or COXIV were calculated.

#### 476 **Western blotting**

477 Protein samples were diluted with 6 $\times$  SDS PAGE loading buffer and then boiled  
478 for 10 min. Boiled samples were loaded to 15% SDS-polyacrylamide gels for  
479 electrophoresis, and then transferred to polyvinylidene fluoride (PVDF) membrane.  
480 After transferring, the PVDF membrane was blocked in PBS/5% BSA/0.05%  
481 Tween-20 at 37 $^{\circ}$ C for 2 h with gentle shaking, and then probed with the primary  
482 antibody under the same condition as blocking. Then, the membrane was incubated  
483 with the secondary antibody. The PVDF membranes were visualized by enhanced  
484 chemiluminescence (ECL) detection as recommended by the manufacturer.

#### 485 **Statistical analysis**

486 All experiment were repeated for three times and data were collected for  
487 statistical analysis. Data were analyzed using GraphPad Prism 5 (San Diego, CA) and  
488 presented as mean  $\pm$  SD. Statistical significance was determined using a one-way  
489 ANOVA test, and  $*P < 0.05$  and  $**P < 0.01$  was considered as significant difference.

490 **Acknowledgements:** The authors are grateful to the participants in this study and the  
491 anonymous reviewers and editors for their comments and valuable inputs.

492

493

## References:

- 494 1. Dubey JP. History of the discovery of the life cycle of *Toxoplasma gondii*. *Int J Parasitol.*  
495 2009;39:877-882.
- 496 2. Montoya JG, Liesenfeld O. Toxoplasmosis. *Lancet.* 2004;363:1965-1976.
- 497 3. Ajzenberg D, Bañuls AL, Su C, Dumètre A, Demar M, Carme B, et al. Genetic diversity,  
498 clonality and sexuality in *Toxoplasma gondii*. *Int J Parasitol.* 2004;34:1185-1196.
- 499 4. Howe DK, Summers BC, Sibley LD. Acute virulence in mice is associated with markers on  
500 chromosome VIII in *Toxoplasma gondii*. *Infect Immun.* 1996;64:5193-5198.
- 501 5. Ichim G, Tait SW. A fate worse than death: apoptosis as an oncogenic process. *Nat Rev Cancer.*  
502 2016;16:539-548.
- 503 6. Yamaki K, Hong J, Hiraizumi K, Ahn JW, Zee O, Ohuchi K. Participation of various kinases in  
504 staurosporine-induced apoptosis of RAW 264.7 cells. *J Pharm Pharmacol.* 2002;54:1535-1544.
- 505 7. Zamaraeva MV, Sabirov RZ, Maeno E, Ando-Akatsuka Y, Bessonova SV, Okada Y. Cells die  
506 with increased cytosolic ATP during apoptosis: a bioluminescence study with intracellular luciferase.  
507 *Cell Death Differ.* 2005;12:1390-1397.
- 508 8. Lu N, Wang B, Deng X, Zhao H, Wang Y, Li D. Autophagy occurs within an hour of adenosine  
509 triphosphate treatment after nerve cell damage: the neuroprotective effects of adenosine triphosphate  
510 against apoptosis. *Neural Regen Res.* 2014;9:1599-1605.
- 511 9. Luder CG, Gross U, Lopes MF. Intracellular protozoan parasites and apoptosis: diverse strategies  
512 to modulate parasite-host interactions. *Trends Parasitol.* 2001;17:480-486.
- 513 10. Wang T, Zhou J, Gan X, Wang H, Ding X, Chen L, et al. *Toxoplasma gondii* induce apoptosis of  
514 neural stem cells via endoplasmic reticulum stress pathway. *Parasitology.* 2014;141:988-995.
- 515 11. Hwang I, Quan JH, Ahn M, Hassan Ahmed HA, Cha G, Shin D, et al. *Toxoplasma gondii*  
516 infection inhibits the mitochondrial apoptosis through induction of Bcl-2 and HSP70. *Parasitol Res.*  
517 2010;107:1313-1321.
- 518 12. Yamada T, Tomita T, Weiss LM, Orlofsky A. *Toxoplasma gondii* inhibits granzyme B-mediated  
519 apoptosis by the inhibition of granzyme B function in host cells. *Int J Parasitol.* 2011;41:595-607.
- 520 13. Angeloni MB, Silva NM, Castro AS, Gomes AO, Silva DAO, Mineo JR, et al. Apoptosis and S

- 521 Phase of the Cell Cycle in BeWo Trophoblastic and HeLa Cells are Differentially Modulated by  
522 *Toxoplasma gondii* Strain Types. *Placenta*. 2009;30:785-791.
- 523 14. Wan L, Gong L, Wang W, An R, Zheng M, Jiang Z, et al. *T. gondii* rhopty protein ROP18  
524 induces apoptosis of neural cells via endoplasmic reticulum stress pathway. *Parasit Vectors*.  
525 2015;8:554-562.
- 526 15. Wu L, Wang X, Li Y, Liu Y, Su D, Fu T, et al. *Toxoplasma gondii* ROP18: potential to  
527 manipulate host cell mitochondrial apoptosis. *Parasitology Res*. 2016;115:2415-2422.
- 528 16. North RA. P2X receptors: a third major class of ligand-gated ion channels. *Ciba Found Symp*.  
529 1996;198:91-105.
- 530 17. Wen H, Evans RJ. Contribution of the intracellular C terminal domain to regulation of human  
531 P2X1 receptors for ATP by phorbol ester and Gq coupled mGlu1  $\alpha$  receptors. *Eur J Pharmacol*.  
532 2011;654:155-159.
- 533 18. Vial C, Tobin AB, Evans RJ. G-protein-coupled receptor regulation of P2X1 receptors does not  
534 involve direct channel phosphorylation. *Biochem J*. 2004;382:101-110.
- 535 19. Gan M, Moussaud S, Jiang P, McLean PJ. Extracellular ATP induces intracellular  
536 alpha-synuclein accumulation via P2X1 receptor-mediated lysosomal dysfunction. *Neurobiol Aging*.  
537 2015;36:1209-1220.
- 538 20. Woehrle T, Yip L, Elkhali A, Sumi Y, Chen Y, Yao Y, et al. Pannexin-1 hemichannel-mediated  
539 ATP release together with P2X1 and P2X4 receptors regulate T-cell activation at the immune synapse.  
540 *Blood*. 2010;116:3475-3484.
- 541 21. Sim JA, Park CK, Oh SB, Evans RJ, North RA. P2X1 and P2X4 receptor currents in mouse  
542 macrophages. *Br J Pharmacol*. 2007;152:1283-1290.
- 543 22. Kassa RM, Bentivoglio M, Mariotti R. Changes in the expression of P2X1 and P2X2 purinergic  
544 receptors in facial motoneurons after nerve lesions in rodents and correlation with motoneuron  
545 degeneration. *Neurobiol Dis*. 2007;25:121-133.
- 546 23. Burnstock G. Purinergic signalling in the reproductive system in health and disease. *Purinergic*  
547 *Signal*. 2014;10:157-187.
- 548 24. Chvatchko Y, Valera S, Aubry JP, Renno T, Buell G, Bonnefoy JY. The involvement of an  
549 ATP-gated ion channel, P(2X1), in thymocyte apoptosis. *Immunity*. 1996;5:275-283.

- 550 25. Xia J, Kong L, Zhou LJ, Wu SZ, Yao LJ, He C, et al. Genome-Wide Bimolecular Fluorescence  
551 Complementation-Based Proteomic Analysis of *Toxoplasma gondii* ROP18's Human Interactome  
552 Shows Its Key Role in Regulation of Cell Immunity and Apoptosis. *Front Immunol.* 2018;9:61.
- 553 26. Hippe D, Lytovchenko O, Schmitz I, Luder CG. Fas/CD95-Mediated Apoptosis of Type II Cells  
554 Is Blocked by *Toxoplasma gondii* Primarily via Interference with the Mitochondrial Amplification  
555 Loop. *Infect Immun.* 2008;76:2905-2912.
- 556 27. Thornberry NA, Lazebnik Y. Caspases: Enemies Within. *science.* 1998;281:1312-1316.
- 557 28. Sanecka A, Frickel E. Use and abuse of dendritic cells by *Toxoplasma gondii*. *Virulence.*  
558 2014;3:678-689.
- 559 29. Rall GF, Mucke L, Oldstone MB. Consequences of cytotoxic T lymphocyte interaction with  
560 major histocompatibility complex class I-expressing neurons in vivo. *J Exp Med.* 1995;182:1201-1212.
- 561 30. Yang Z, Hou Y, Hao T, Rho HS, Wan J, Luan Y, et al. A Human Proteome Array Approach to  
562 Identifying Key Host Proteins Targeted by *Toxoplasma* Kinase ROP18. *Mol Cell Proteomics.*  
563 2017;16:469-484.
- 564 31. Kawano A, Tsukimoto M, Noguchi T, Hotta N, Harada H, Takenouchi T, et al. Involvement of  
565 P2X4 receptor in P2X7 receptor-dependent cell death of mouse macrophages. *Biochem Biophys Res*  
566 *Commun.* 2012;419:374-380.
- 567 32. Wang W, Xiao J, Adachi M, Liu Z, Zhou J. 4-aminopyridine induces apoptosis of human acute  
568 myeloid leukemia cells via increasing  $[Ca^{2+}]_i$  through P2X7 receptor pathway. *Cell Physiol Biochem.*  
569 2011;28:199-208.
- 570 33. Saeij JP, Boyle JP, Collier S, Taylor S, Sibley LD, Brooke-Powell ET, et al. Polymorphic Secreted  
571 Kinases Are Key Virulence Factors in Toxoplasmosis. *Science.* 2006;314:1780-1783.
- 572 34. Peixoto L, Chen F, Harb OS, Davis PH, Beiting DP, Brownback CS, et al. Integrative Genomic  
573 Approaches Highlight a Family of Parasite-Specific Kinases that Regulate Host Responses. *Cell Host*  
574 *Microbe.* 2010;8:208-218.
- 575 35. Zhu Y, Li M, Wang X, Jin H, Liu S. Caspase cleavage of cytochrome c1 disrupts mitochondrial  
576 function and enhances cytochrome c release. *Cell Res.* 2012;22:127-141.
- 577 36. Mei Y, Stonestrom A, Hou Y, Yang X. Apoptotic regulation and tRNA. *Protein Cell.*  
578 2010;1:795-801.

- 579 37. Boatright KM, Salvesen GS. Mechanisms of caspase activation. *Curr Opin Cell Biol.*  
580 2003;15:725-731.
- 581 38. Acehan D, Jiang X, Morgan DG, Heuser JE, Wang X, Akey CW. Three-dimensional structure of  
582 the apoptosome: implications for assembly, procaspase-9 binding, and activation. *Mol Cell.*  
583 2002;9:423-432.
- 584 39. Sas K, Szabó E, Vécsei L. Mitochondria, Oxidative Stress and the Kynurenine System, with a  
585 Focus on Ageing and Neuroprotection. *Molecules.* 2018;23:191.
- 586 40. Islam BU, Habib S, Ali SA, Moinuddin, Ali A. Role of Peroxynitrite-Induced Activation of  
587 Poly(ADP-Ribose) Polymerase (PARP) in Circulatory Shock and Related Pathological Conditions.  
588 *Cardiovasc Toxicol.* 2017;17:373-383.
- 589 41. Birkinshaw RW, Czabotar PE. The BCL-2 family of proteins and mitochondrial outer membrane  
590 permeabilisation. *Semin Cell Dev Biol.* 2017;72:152-162.
- 591 42. Kluck RM, Bossy-Wetzel E, Green DR, Newmeyer DD. The Release of Cytochrome c from  
592 Mitochondria: A Primary Site for Bcl-2 Regulation of Apoptosis. *Science.* 1997;275:1132-1136.
- 593 43. Ugarte-Urbe B, Garcia-Saez AJ. Apoptotic foci at mitochondria: in and around Bax pores. *Philos*  
594 *Trans R Soc Lond B Biol Sci.* 2017;372:20160217.
- 595 44. Vucicevic K, Jakovljevic V, Colovic N, Tosic N, Kostic T, Glumac I, et al. Association of Bax  
596 Expression and Bcl2/Bax Ratio with Clinical and Molecular Prognostic Markers in Chronic  
597 Lymphocytic Leukemia. *J Med Biochem.* 2016;35:150-157.
- 598 45. Park EK, Jung HS, Yang HI, Yoo MC, Kim C, Kim KS. Optimized THP-1 differentiation is  
599 required for the detection of responses to weak stimuli. *Inflamm Res.* 2007;56:45-50.
- 600 46. Vermes I, Haanen C, Steffens-Nakken H, Reutelingsperger C. A novel assay for apoptosis. Flow  
601 cytometric detection of phosphatidylserine expression on early apoptotic cells using fluorescein  
602 labelled Annexin V. *J Immunol Methods.* 1995;184:39-51.
- 603 47. Kurita-Ochiai T, Amano S, Fukushima K, Ochiai K. Cellular Events Involved in Butyric  
604 Acid-Induced T Cell Apoptosis. *J Immunol.* 2003;171:3576-3584.
- 605 48. Suman S, Pandey A, Chandna S. An improved non-enzymatic “DNA ladder assay” for more  
606 sensitive and early detection of apoptosis. *Cytotechnology.* 2012;64:9-14.
- 607 49. He C, Kong L, Zhou L, Xia J, Wei H, Liu M, et al. Host Cell Vimentin Restrains Toxoplasma

608 *gondii* Invasion and Phosphorylation of Vimentin is Partially Regulated by Interaction with TgROP18.

609 Int J Biol Sci. 2017;13:1126-1137.

610 50. Elangovan M, Wallrabe H, Chen Y, Day RN, Barroso M. Characterization of one-and two-photon  
611 excitation fluorescence resonance energy transfer microscopy. methods. 2003;29:58-73.

612 51. Foltman M, Sanchez-Diaz A. Studying Protein-Protein Interactions in Budding Yeast Using  
613 Co-immunoprecipitation. Methods Mol Biol. 2016;1369:239-256.

614 52. De Biasi S, Gibellini L, Cossarizza A. Uncompensated Polychromatic Analysis of Mitochondrial  
615 Membrane Potential Using JC-1 and Multilaser Excitation. Curr Protoc Cytom. 2015;72:7-32.

616

617

618 **Figure legends:**

619 **Figure 1. RH, ME49 and VEG infection inhibited SF268 cell apoptosis induced**  
620 **by STS at 6h and 28h post infection.**

621 SF268 cells were infected with RH, ME49 and VEG strains, respectively (MOI = 3)  
622 for 2h or 22h followed by treating with staurosporine (STS) for 4 h or 6h. The cells  
623 were collected for apoptosis detection by flow cytometry (FCM). **A:** FCM detection  
624 of apoptotic cells at 6h and 28h post infection. Apoptotic cells included the early  
625 apoptotic cells (Annexin V<sup>+</sup>/ PI<sup>-</sup>) and the late apoptotic cells (Annexin V<sup>+</sup>/ PI<sup>+</sup>).

626 **B&C:** The quantitative data converted from FCM, at 6h and 28h post infection,  
627 respectively. Values were expressed as mean ± SD in each group, and the experiments  
628 were repeated three times for one-way ANOVA statistical analysis (\*\**P* < 0.01). The  
629 results showed that *T. gondii* infection significantly inhibited SF268 cell apoptosis  
630 induced by STS regardless of strain virulence.

631 **Figure 2. *T. gondii* major virulence factor ROP18 inhibited SF268 cell apoptosis**  
632 **induced by ATP.**

633 The SF268 cells were infected with RH or RH- $\Delta rop18$  tachyzoites (MOI=13) or left  
634 uninfected for normal control (N) or positive control (ATP treatment). At 12 h post  
635 infection, 1 mg/ml ATP was added to the cells for additional 12 h except the normal  
636 control group. **A:** The apoptosis of the SF268 cells from each group was detected by

637 flow cytometry after Annexin V-FITC/PI staining. **B:** The percentages of apoptotic  
638 cells were separately determined for each group of cells. Values were expressed as  
639 mean  $\pm$  SD in each cell group, and the experiments were repeated three times for  
640 one-way ANOVA (\*\* $P < 0.01$ ). The SF268 cells infected by RH strain showed a  
641 significantly lower apoptosis rate compared to the RH- $\Delta rop18$  infection group,  
642 suggesting that *TgROP18* inhibited SF268 apoptosis significantly.

643 **Figure 3. Identification of host cell P2X1 binding to *TgROP18* by FRET and**  
644 **CO-IP.**

645 **A:** FRET identification of ROP18 binding to P2X1. COS7 cells were cultured in  
646 plates the day before transfection. pECFP-N1-ROP18 and pEYFP-C1-P2X1 were  
647 co-transfected for the experimental group. pECFP-N1 and pEYFP-C1 were  
648 co-transfected for the negative control, and pEYFP-CFP was transfected for the  
649 positive control. The cells were stabilized for FRET experiment at 48 h post infection.  
650 The color matching the FRET signal intensity scale was shown in the FRET image of  
651 each transfection group. **B:** Quantitative analysis of FRET efficiency. The  
652 experimental group co-transfected with pECFP-N1-ROP18 and pEYFP-C1-P2X1  
653 showed a significantly higher FRET efficiency than the negative control group. **C:**  
654 Lysates of COS7 cells transiently transfected with the indicated plasmids of  
655 pcDNA-ROP18-3 $\times$ Flag and/or pcDNA-P2X1- HA were immunoprecipitated with the  
656 anti-HA antibody and detected by western blotting with the indicated antibodies. The  
657 result showed an association of ROP18 with P2X1 in both overexpressed cells. **D:**  
658 Lysates of SF268 cells infected with RH- ROP18-Flag(MOI= 3) for 36h or not were  
659 immunoprecipitated with anti-Flag antibody and detected by western blotting with the  
660 indicated antibodies. The result showed an association of endogenous ROP18 with  
661 P2X1. **E:** Lysates of COS7 cells transiently transfected with the indicated plasmids of  
662 pcDNA-ROP18-3 $\times$ Flag and/or pcDNA-P2X1-HA, pcDNA-P2X1 $\Delta$ 339-399- HA  
663 were immunoprecipitated with the anti-HA antibody and detected by western blotting  
664 with the indicated antibodies. The result showed that different from the full length  
665 P2X1, the mutant with P2X1-C terminus deletion did not bind with ROP18, which

666 indicated that the intracellular carboxyl terminus of P2X1 was indispensable for its  
667 binding with ROP18.

668 **Figure 4. *Tg*ROP18 inhibited host cell apoptosis promoted by P2X1.**

669 Five groups of COS7 cells were transfected with pcDNA-ROP18 and/or  
670 pcDNA-P2X1, or not transfected, and then stimulated with ATP or not as indicated.  
671 Four groups of SF268 cells were treated with ATP and/or NF449 or not treated as  
672 indicated. **A:** The apoptosis rate of the cells in each group was detected by flow  
673 cytometry after Annexin V-FITC/PI staining. The results shown were the  
674 representative images of three independent experiments. **B:** The expression of  
675 Flag-tagged ROP18 and HA-tagged P2X1 was detected with western blot. **C&D:** The  
676 experiments were repeated for three times for one-way ANOVA statistical analysis,  
677 and the apoptosis rates of each group was expressed as mean  $\pm$  SD. The result showed  
678 that P2X1 overexpression significantly promoted SF268 apoptosis, and *T. gondii*  
679 ROP18 overexpression significantly inhibited SF268 apoptosis induced by P2X1  
680 overexpression (\*\*  $p < 0.01$ ) (Figure 4C). When the activity of P2X1 in ATP treated  
681 SF268 cells was inhibited with NF449, the cell apoptosis rate was significantly  
682 decreased compared to which of the ATP treatment group, and not significantly  
683 different from which of the normal control group (\*\*  $p < 0.01$ ) (Figure 4D).

684 **Figure 5. *Tg*ROP18 inhibited host cell apoptosis through inhibition of**  
685 **P2X1-mediated calcium influx but not through P2X1 degradation despite of**  
686 **their interaction.**

687 COS7 cells were transfected with 2.0 $\mu$ g of pcDNA-P2X1-HA and/or  
688 pcDNA-ROP18-3 $\times$ Flag, or were transfected with a stable amount (2.0 $\mu$ g) of  
689 pcDNA-P2X1-HA and sequentially co-transfected with 0, 0.5, 1.0, and 2.0 $\mu$ g of  
690 pcDNA-ROP18-3 $\times$ Flag respectively as indicated in each group. Ca<sup>2+</sup> influx detection  
691 in each group were analyzed using flow cytometry after the cells were stimulated with  
692 ATP. The results shown were representative of three independent experiments. **A:**  
693 The expression of Flag-tagged ROP18 and HA-tagged P2X was detected with  
694 western blot. **B:** The experiments were repeated three times for one-way ANOVA



695 statistical analysis, and the maximum elevation (F/F<sub>0</sub>) of the intracellular Ca<sup>2+</sup> of each  
696 group was expressed as mean ± SD (\* *P* < 0.05). The calcium influx level in P2X1  
697 overexpressed cells was significantly higher than which in the cells with both P2X1  
698 and ROP18 overexpression, which indicated that ROP18 significantly inhibited Ca<sup>2+</sup>  
699 influx in SF268 cells. **C:** The result showed that ROP18 does not decrease P2X1  
700 protein level, indicating that ROP18 didn't degrade P2X1.

701 **Figure 6. *Tg*ROP18 inhibited ATP-induced mitochondrial depolarization in**  
702 **SF268 cells.**

703 The SF268 cells were infected with RH or RH-*Δrop18* tachyzoites at MOI of 13 or  
704 left uninfected, and then induced for apoptosis with 1 mg/ml ATP for additional 12h.  
705 **A:** The cells were stained with JC-1 and examined under a fluorescence microscope  
706 (10×) to determine the mitochondrial membrane depolarization. **B:** The cells were  
707 stained with JC-1 and examined under flow cytometry to determine the mitochondrial  
708 membrane depolarization. **C:** The percentages of green fluorescence to red  
709 fluorescence were determined by flow cytometry for each group of cells. Values are  
710 expressed as mean ± SD in each cell group, and the experiments were repeated three  
711 times for statistical analysis by one-way ANOVA (\*\**P* < 0.01, \**P* < 0.05). The result  
712 indicated that when treated with ATP, the RH-*Δrop18* infected group showed  
713 significant mitochondrial depolarization compared to the RH infected group and the  
714 uninfected group.

715 **Figure 7. *Tg*ROP18 inhibits Cyt C release from mitochondria to cytoplasm in**  
716 **ATP treated SF268 cells.**

717 The SF268 cells were prepared as indicated in the legend of Figure 6. The cells were  
718 harvested and lysed, and the mitochondria and cytosol were fractionated. A&B: The  
719 mitochondrial and cytosol fractions were applied to western blot for detection of Cyt  
720 C, Actin and COXIV in cytoplasm and mitochondria fraction respectively, and  
721 detection of Bax, Bcl2 and COXIV in the mitochondria fraction. Data represented one  
722 of three times independent experiments. C: Densitometric analysis of western blotting  
723 using Image-J software was repeated three times. The ratios of Cyt C/actin, Cyt

724 C/COXIV, Bcl2/COXIV, Bax/COXIV and Bcl2/Bax were calculated, and expressed  
725 as mean  $\pm$  SD (\*\*  $P < 0.01$ ). The bar graphs showed that when induced by ATP in  
726 SF268 cells, RH infection significantly inhibited Cyt C translocation from  
727 mitochondria to cytoplasm (C1&C2), and increased Bcl2 and Bax's translocation from  
728 cytoplasm to mitochondria (C3&C4) with higher Bcl2/Bax ratio in mitochondria  
729 fraction compared to RH- $\Delta rop18$  infection (C5). All these phenomena showed when  
730 SF268 cell apoptosis was induced with ATP, ROP18 significantly inhibited Cyt C  
731 translocation from mitochondria to cytoplasm and increased Bcl2/Bax ratio in  
732 mitochondria, and therefore inhibited the cell apoptosis.

733 **Figure 8. *Tg*ROP18 inhibited procaspase-3, procaspase-7 and procaspase-9 being**  
734 **cleaved to form caspase-3, caspase-7 and caspase-9 in ATP treated SF268 cells.**

735 The SF268 cells were prepared as indicated in the legend of Figure 6. The cells were  
736 harvested and lysed, the cell lysates were used for the western blot for detection of  
737 procaspase-3, procaspase-7, procaspase-9, pro-PARP, caspase-3, caspase-7, caspase-9  
738 and PARP in SF268 cells. **A:** Antibody for caspase-9 recognized the full length 47  
739 KD and cleaved form (35, 37 KD), antibody for caspase-7 recognized the full length  
740 35 KD and the cleaved form 20 KD, antibody for caspase-3 recognized the full length  
741 35 KD and the cleaved form 17 KD, and antibody for PARP recognized the full  
742 length 116 KD and cleaved form 89 KD. Actin was detected for loading control and  
743 SAG1 was detected for *T. gondii* tachyzoites amount, which showed consistent  
744 amount of host cells in each group and tachyzoites in each infection group. **B:**  
745 Densitometric analysis of western blot was conducted using Image J software, and the  
746 experiments were repeated three times for one-way ANOVA statistical analysis. The  
747 ratios of cleaved caspase-9 / actin, cleaved caspase-7 / actin, cleaved caspase-3 / actin,  
748 and cleaved PARP / actin were calculated and expressed as mean  $\pm$  SD. (\*  $P < 0.05$ ).  
749 The graphs indicated that ROP18 significantly inhibited the cleavage of the  
750 full-length caspase-9, caspase -3 and caspase-7 to active forms, but had no effect on  
751 pro-PARP. All these caspases cleavage analysis showed that SF268 cell apoptosis  
752 induced by ATP was significantly inhibited by ROP18.

753 **Figure S1. Infection with *T. gondii* RH, ME49 and VEG inhibits STS-induced**  
754 **apoptosis of RAW264.7, THP-1 at 6h post infection.**

755 The indicated cells were infected with RH, ME49 and VEG strains, respectively, at  
756 MOI (multiplicity of infection) of 3 for 2h and treated with staurosporine (STS) for 4  
757 h. The cells were collected for apoptosis analysis by flow cytometry (FCM) and DNA  
758 fragmentation. **A:** Apoptotic cells included the early apoptotic cells (Annexin V<sup>+</sup>/ PI<sup>-</sup>)  
759 and the late apoptotic cells (Annexin V<sup>+</sup>/ PI<sup>+</sup>). **B:** The quantitative data converted  
760 from FCM data. Values were expressed as mean ± SD in each group, and the  
761 experiments were repeated three times for one-way ANOVA statistical analysis (\*\**P*  
762 < 0.01). **C:** DNA ladder assay of the indicated cells (RAW264.7 and THP-1). 30µl of  
763 lysate from each group was loaded on 1.5% agarose gel for electrophoresis. M: 100bp  
764 DNA ladder. Both the FCM data and the DNA fragmentation detection showed the  
765 apoptosis of RAW264.7 and THP-1 cells induced by STS were significantly blocked  
766 by infection of RH, ME49 and VEG, respectively for 6h.

767 **Figure S2. Infection of *T. gondii* RH, ME49 and VEG inhibits the STS-induced**  
768 **apoptosis of RAW264.7 and THP-1 cells at 28h post infection.**

769 The indicated cells were infected with RH, ME49 and VEG strains, respectively, at  
770 MOI of 3 for 22h and treated with STS for 6h. The cells were collected for apoptosis  
771 analysis by flow cytometry (FCM) and DNA fragmentation. **A:** Apoptotic cells  
772 included the early apoptotic cells (Annexin V<sup>+</sup>/ PI<sup>-</sup>) and the late apoptotic cells  
773 (Annexin V<sup>+</sup>/ PI<sup>+</sup>). **B:** The quantitative data converted from FCM data. Values were  
774 expressed as mean ± SD in each group, and the experiments were repeated three times  
775 for one-way ANOVA statistical analysis (\*\**P* < 0.01). **C:** DNA ladder assay of the  
776 indicated cells (RAW264.7 and THP-1). 30µl of lysate from each group was loaded  
777 on 1.5% agarose gel for electrophoresis. M: 100bp DNA ladder. Both the FCM data  
778 and the DNA fragmentation detection showed the apoptosis of RAW264.7 and THP-1  
779 cells induced by STS were significantly blocked by infection of RH, ME49 and VEG,  
780 respectively for 28h.

781 **Figure S3. *T. gondii* major virulence factor ROP18 didn't inhibit RAW264.7 and**

782 **THP-1 cell apoptosis induced by ATP.**

783 The RAW264.7 and THP-1 cells were infected with RH or RH- $\Delta rop18$  tachyzoites  
784 (MOI=13) or left uninfected for normal control (N) or positive control (ATP  
785 treatment). At 12 h post infection, 1 mg/ml ATP was added to the cells for additional  
786 12 h except the normal control group. **A:** The apoptosis of the SF268 cells from each  
787 group was detected by flow cytometry after Annexin V-FITC/PI staining. **B:** The  
788 percentages of apoptotic cells were separately determined for each group of cells.  
789 Values were expressed as mean  $\pm$  SD in each cell group, and the experiments were  
790 repeated three times for one-way ANOVA statistical analysis (\*\* $P < 0.01$ ). The  
791 RAW264.7 and THP-1 cells infected by RH strain showed no significant different  
792 apoptosis rate compared to the RH- $\Delta rop18$  infection group, which implied that  
793 ROP18 had no effect on the cell apoptosis induced by ATP in RAW264.7 and THP-1  
794 cells.

795 **Table S1. The summarized information of *Toxoplasma gondii* modulating**  
796 **immune and neuro cell apoptosis**

797

A

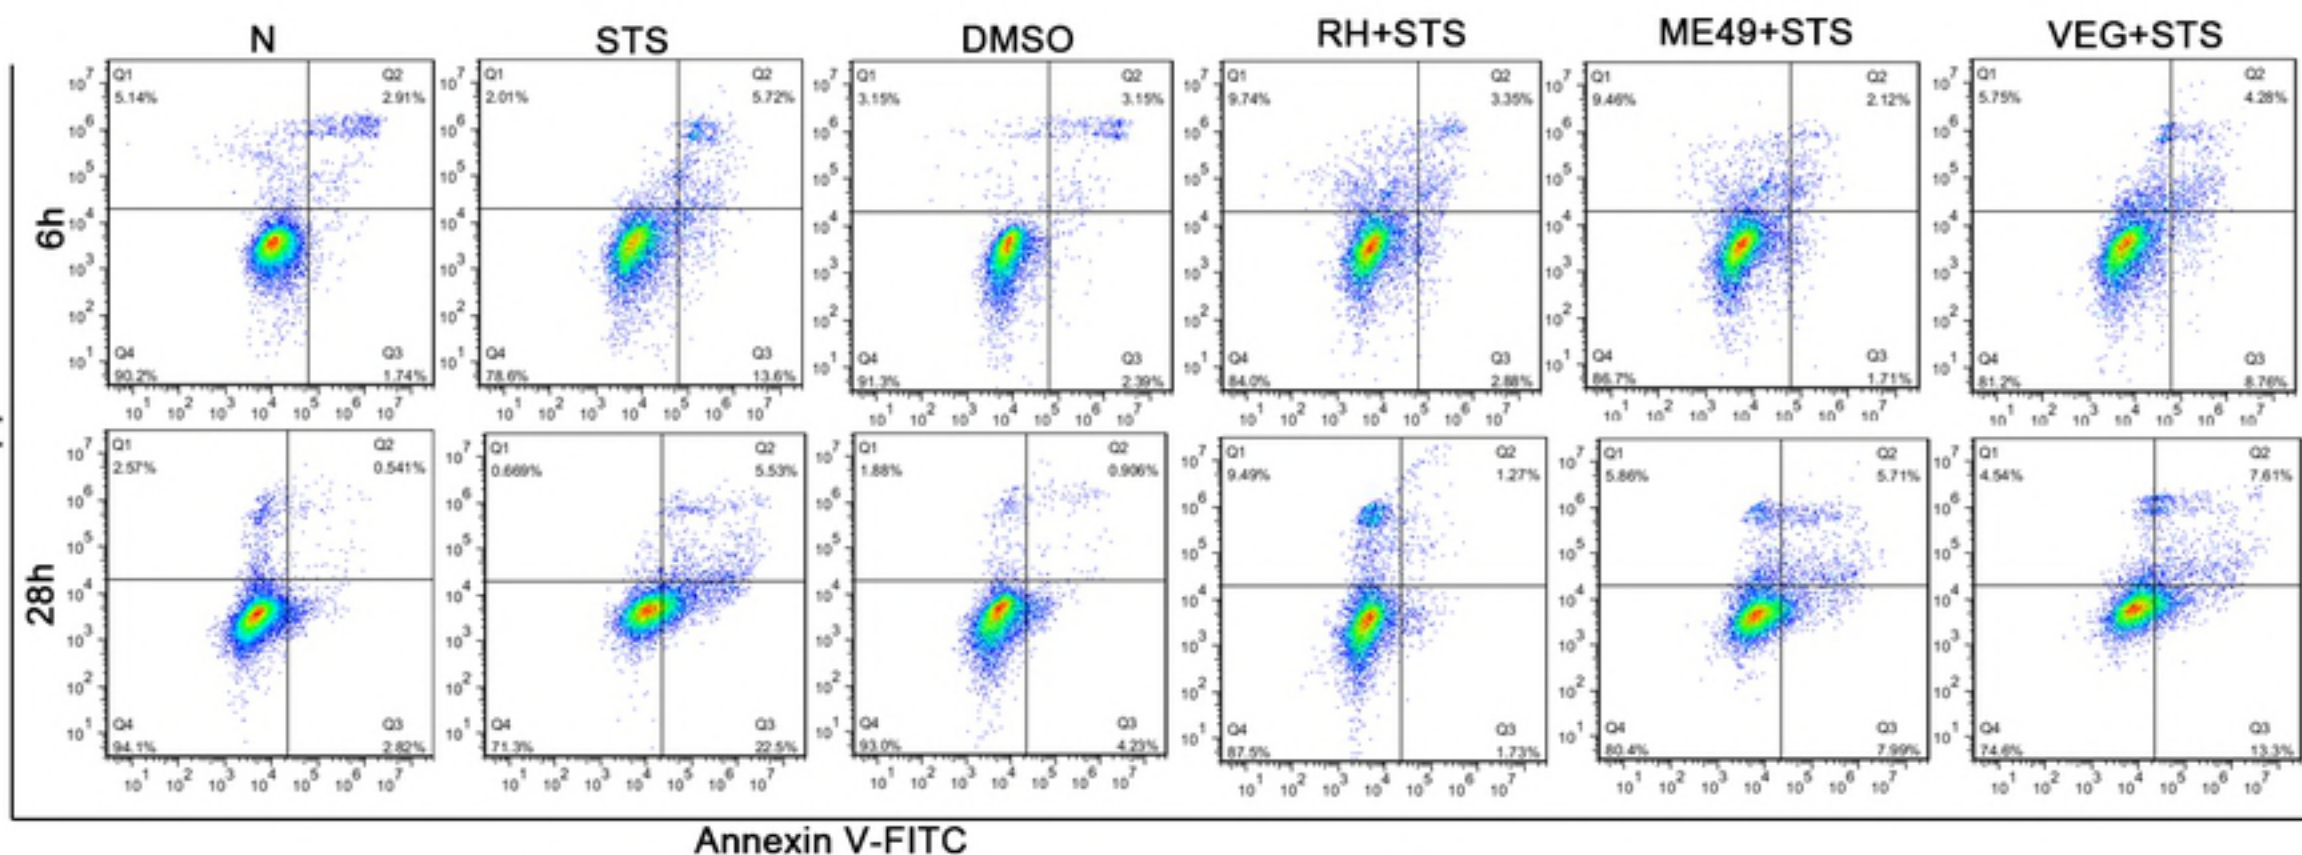

B

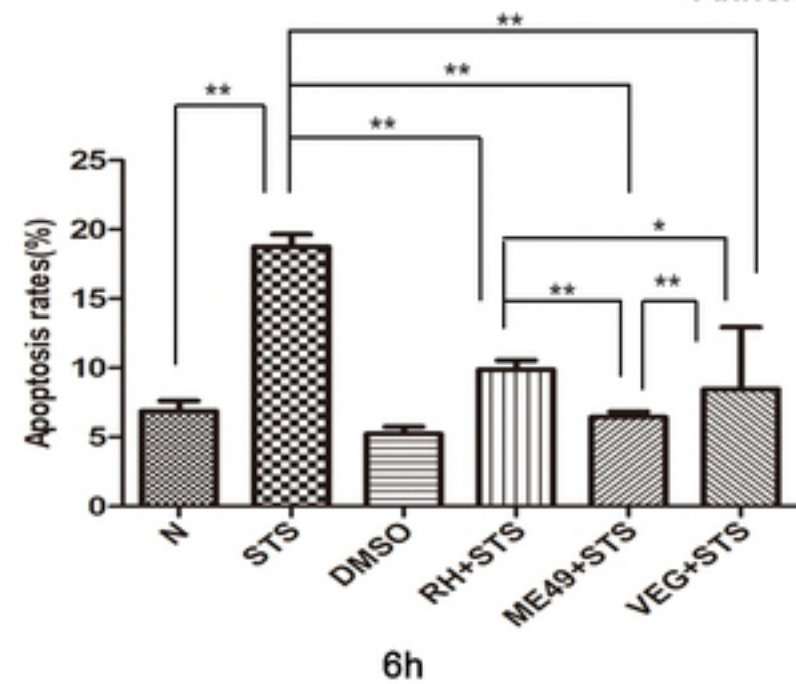

C

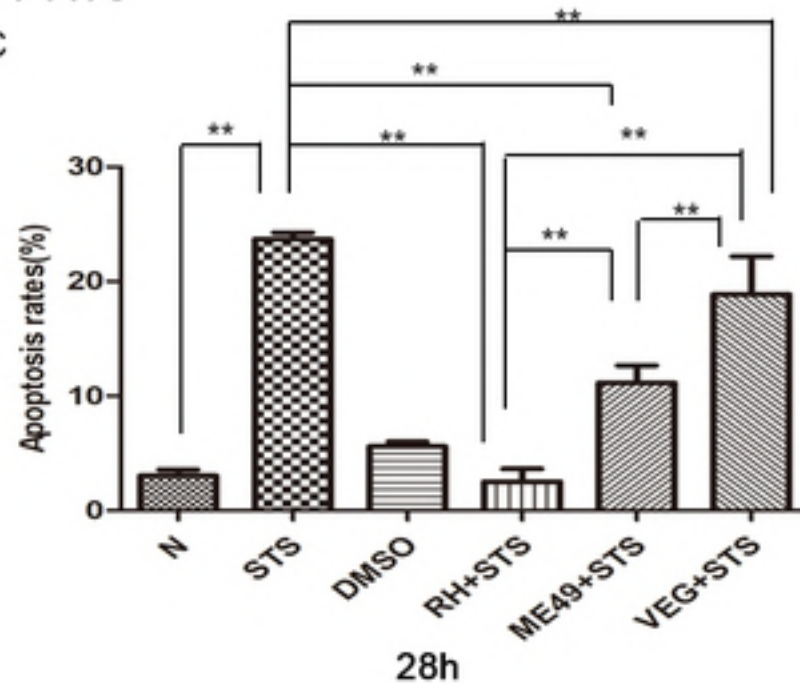

A

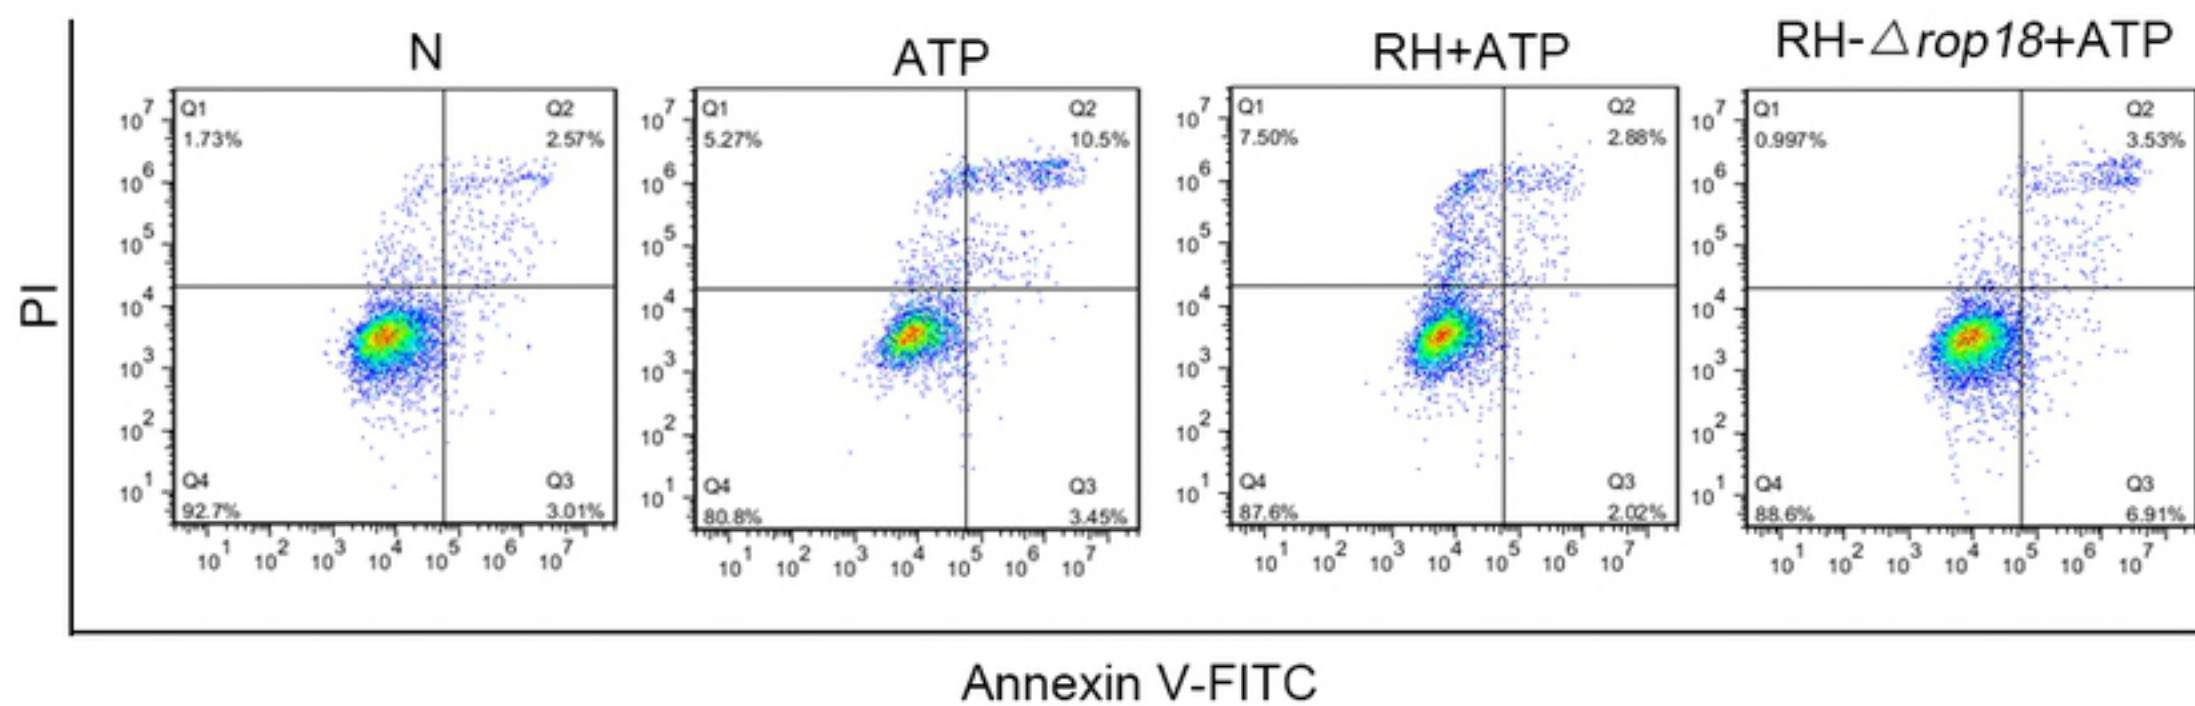

B

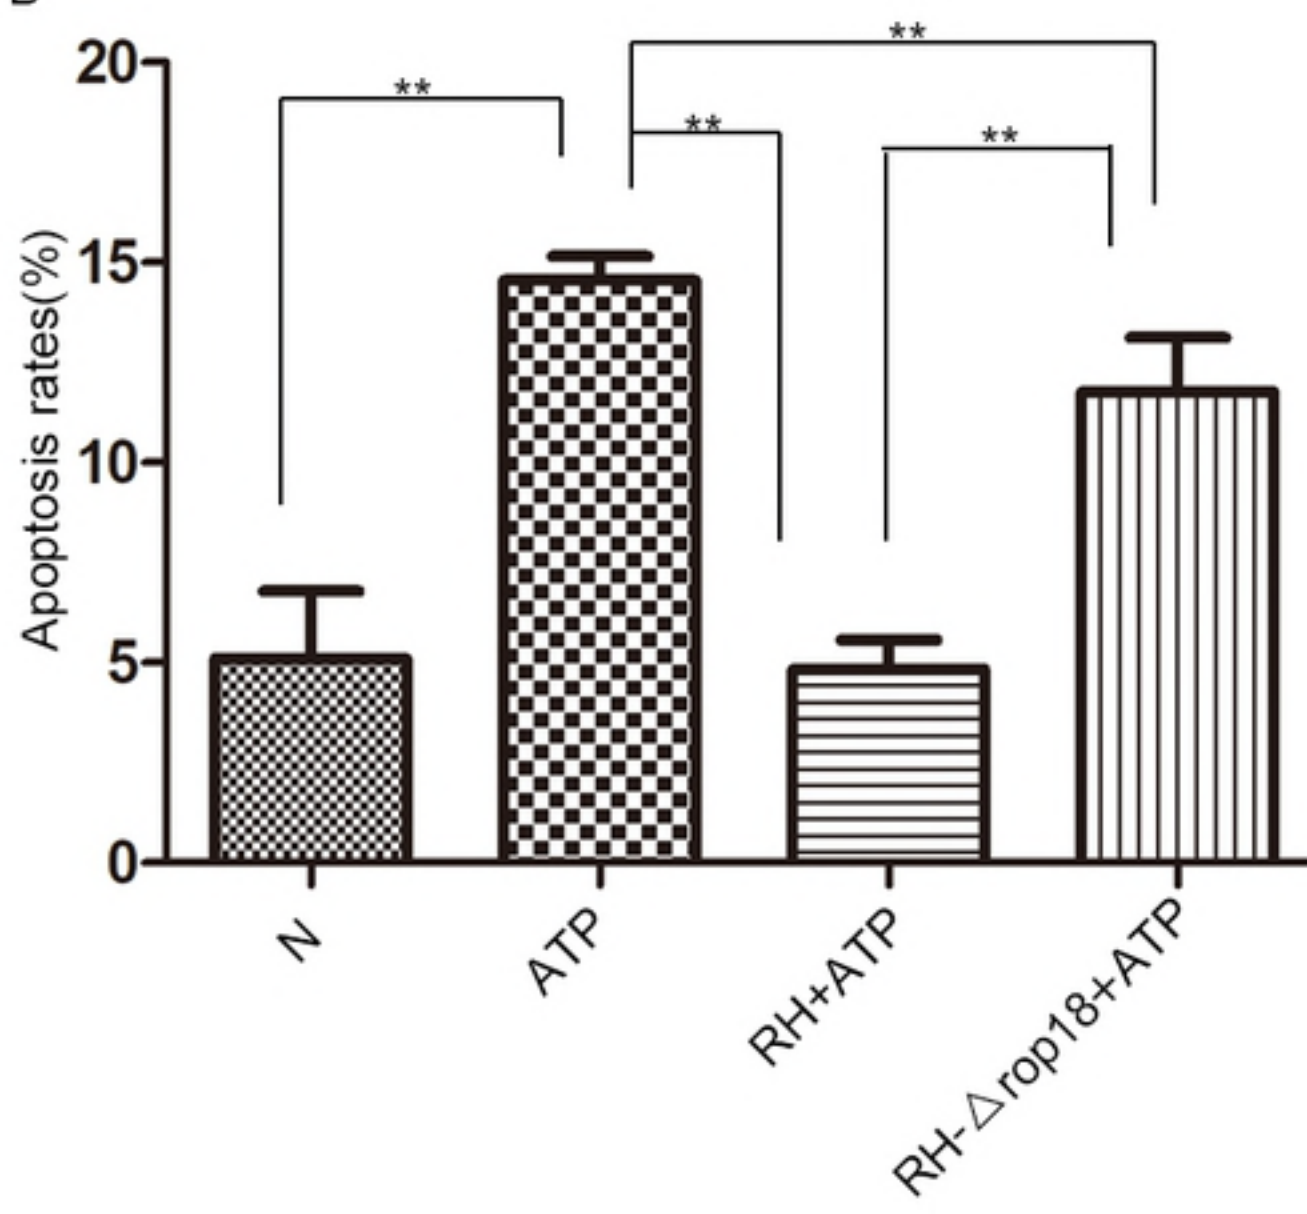

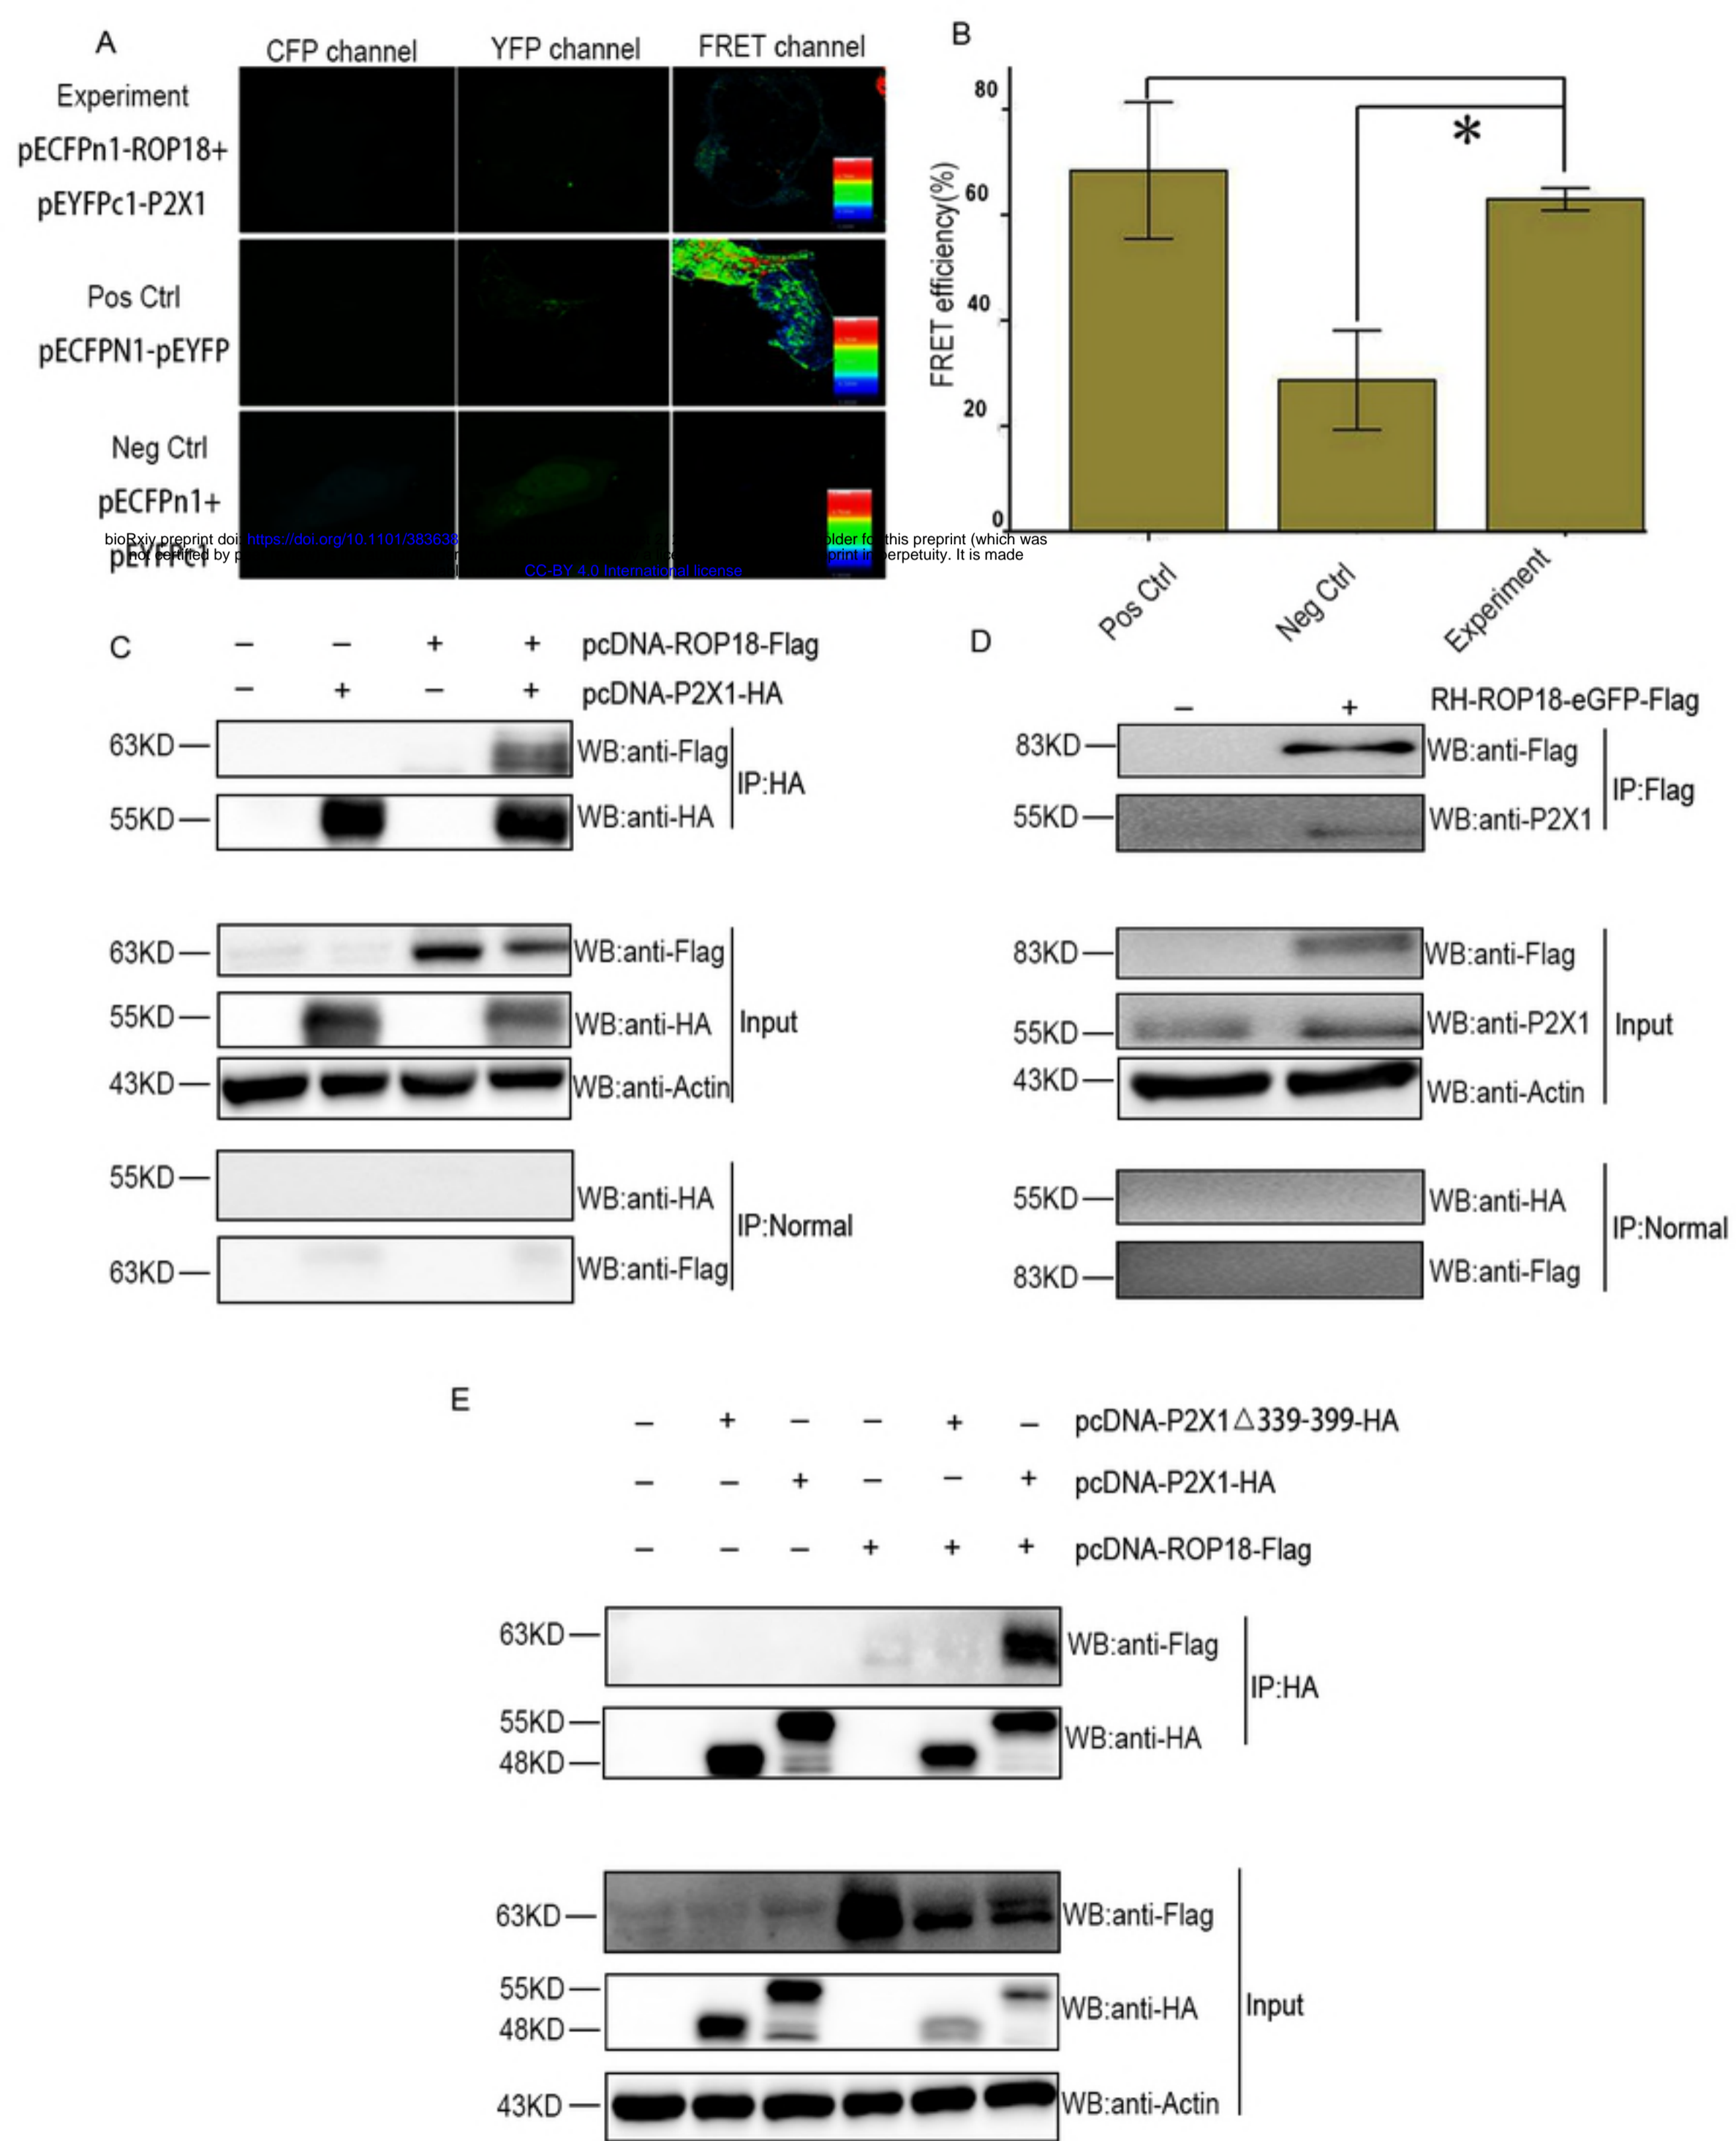

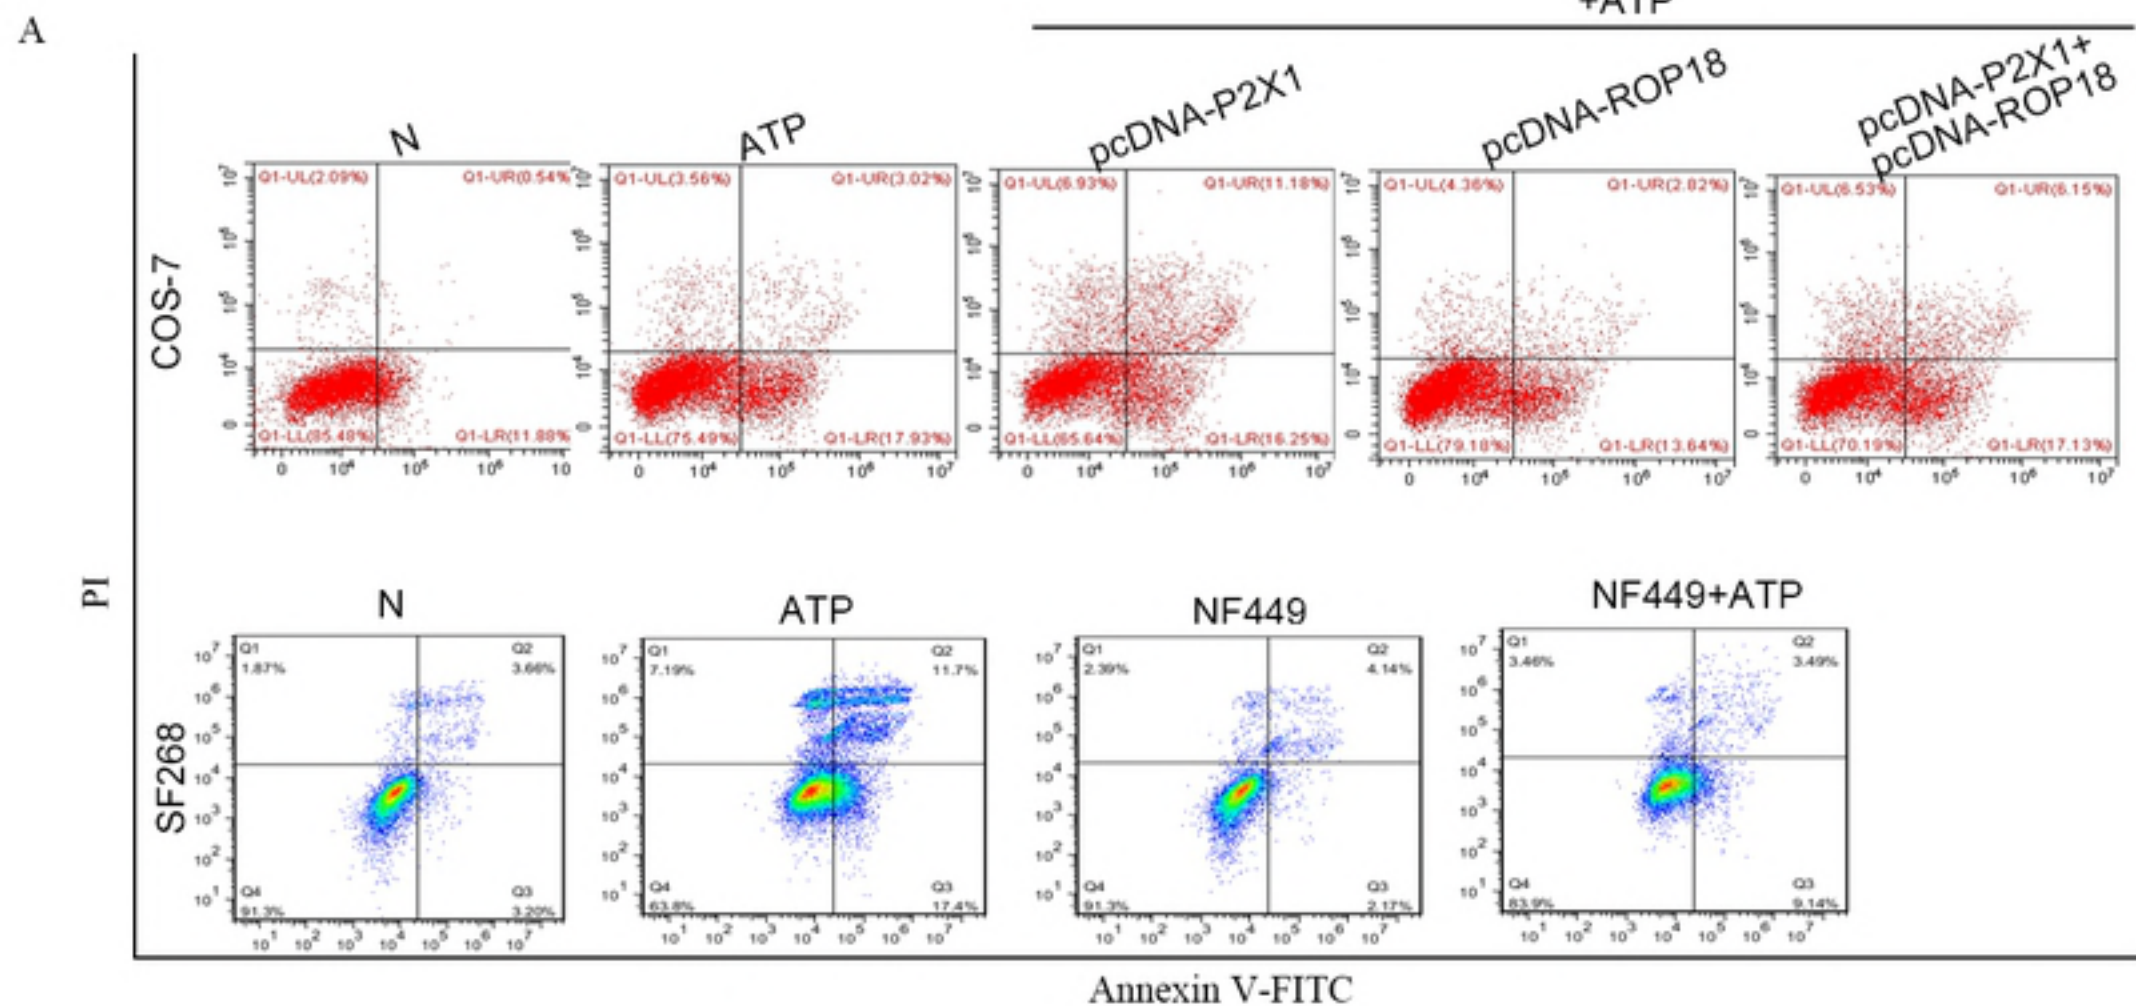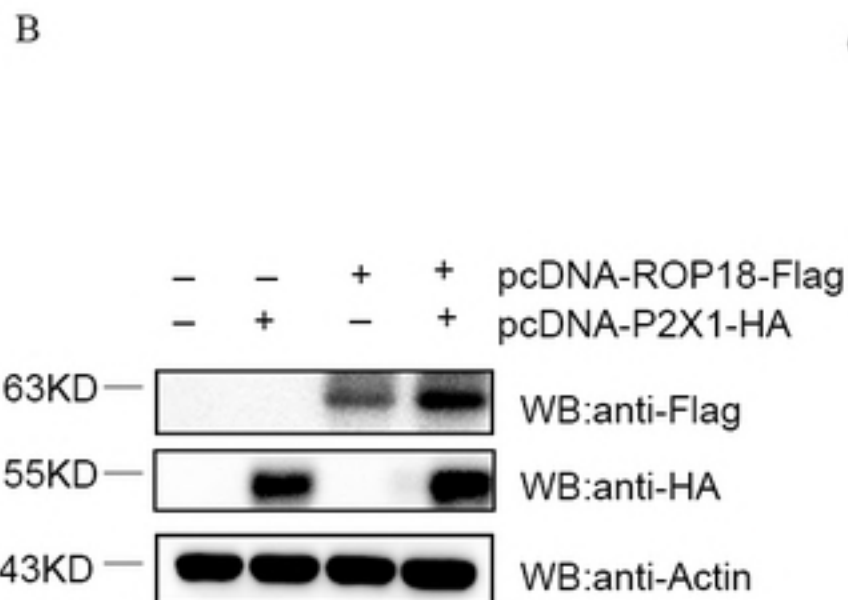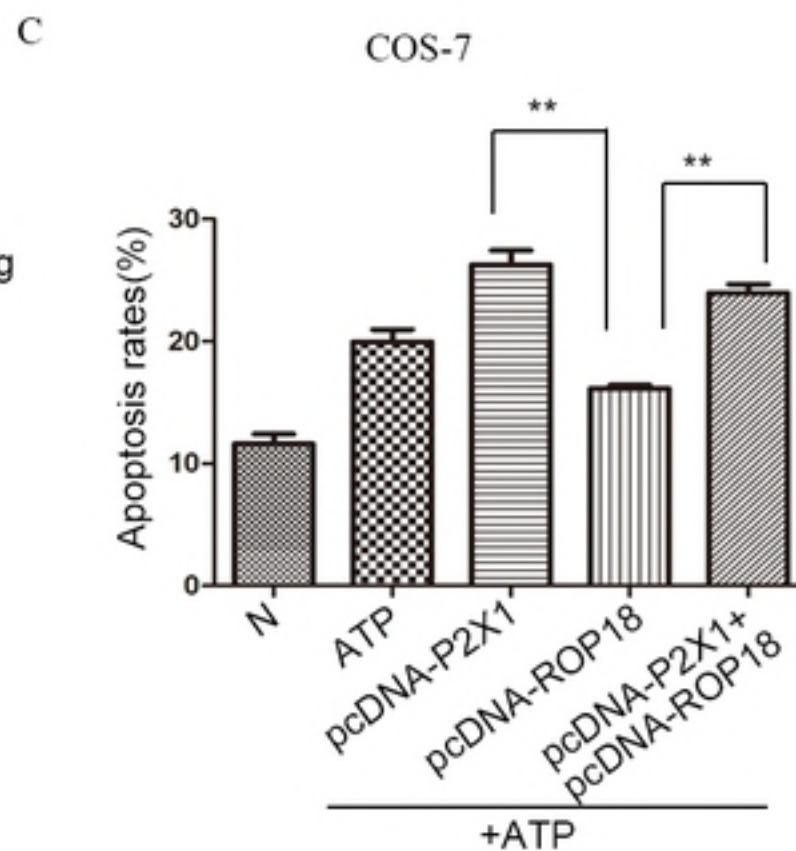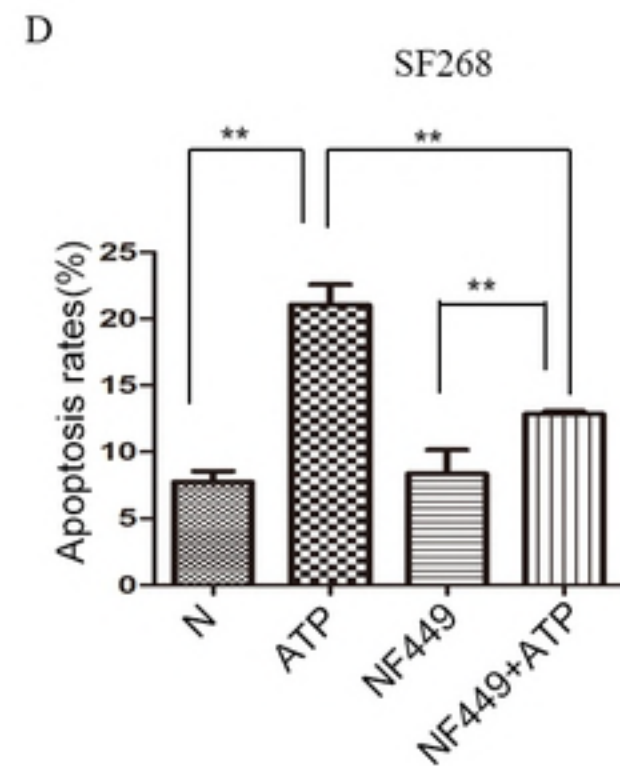



A

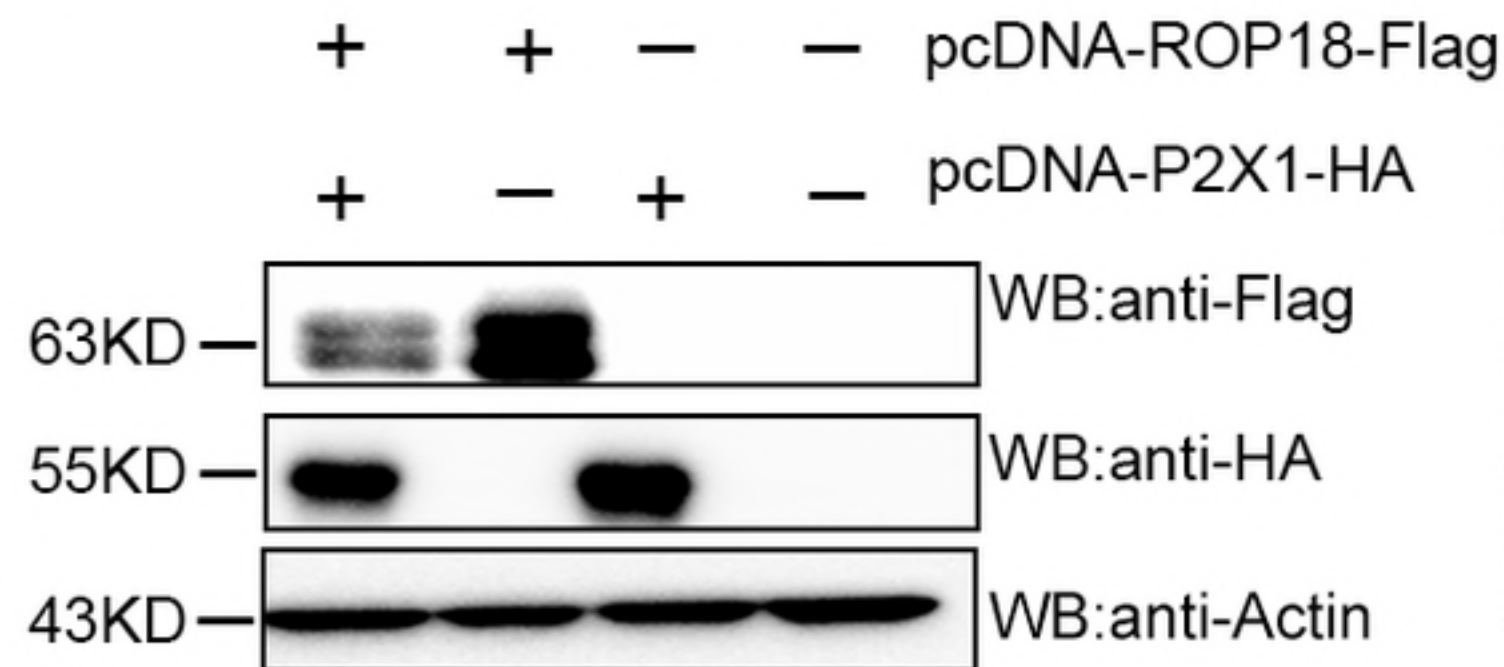

B

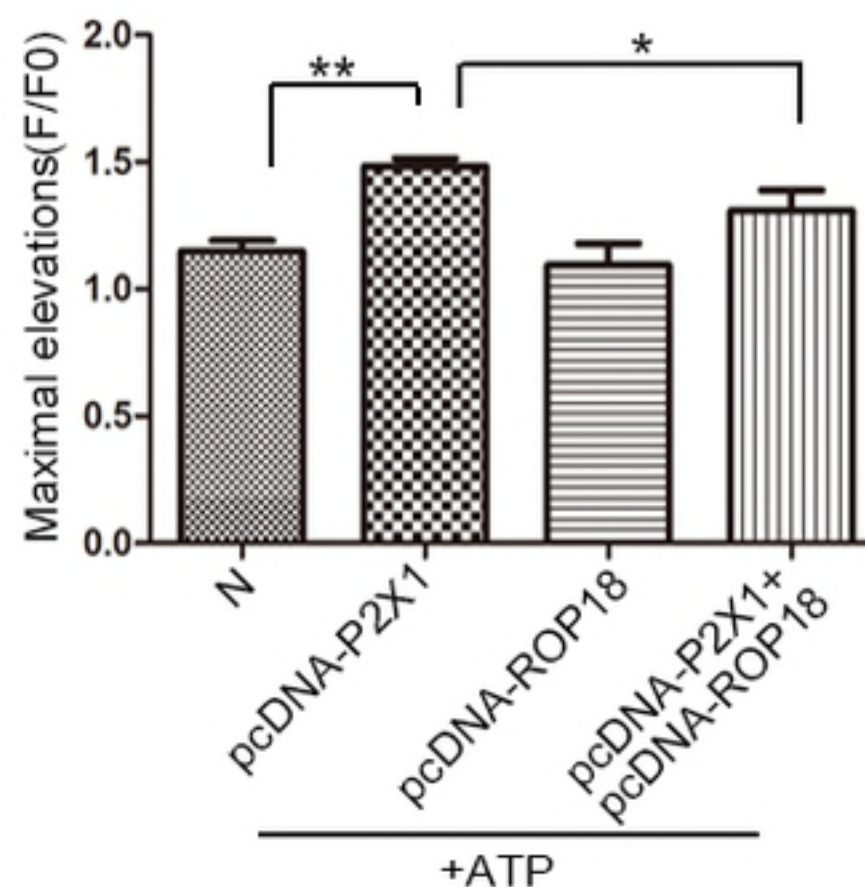

C

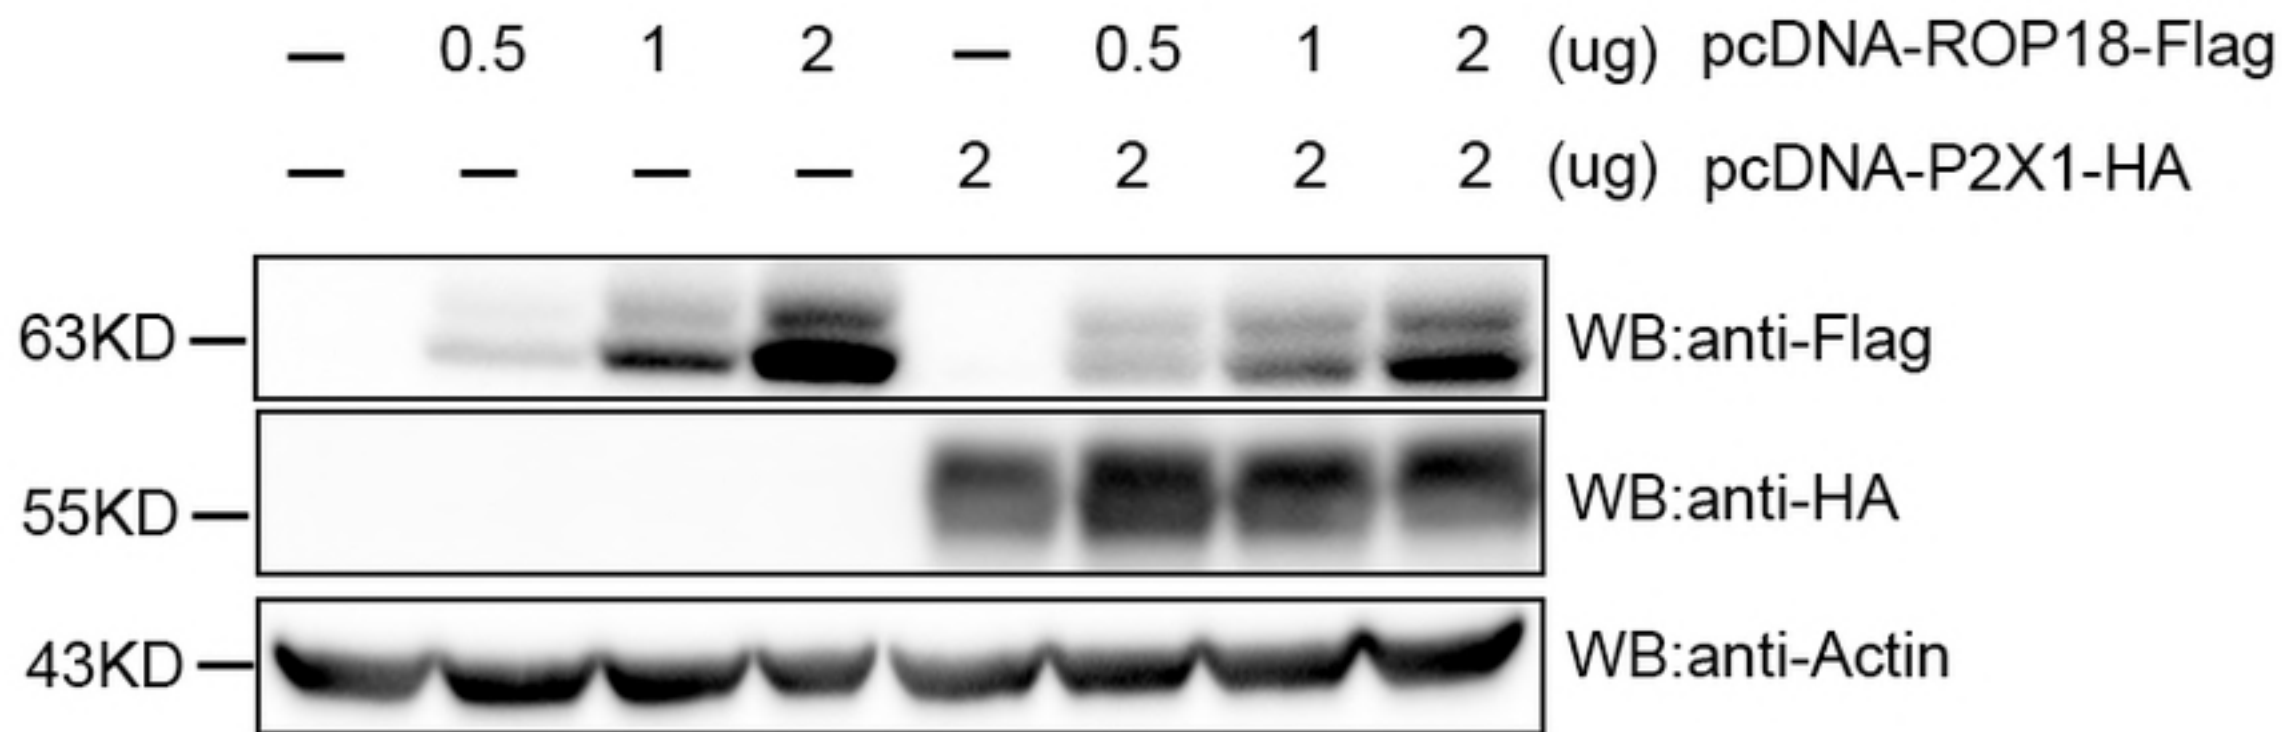

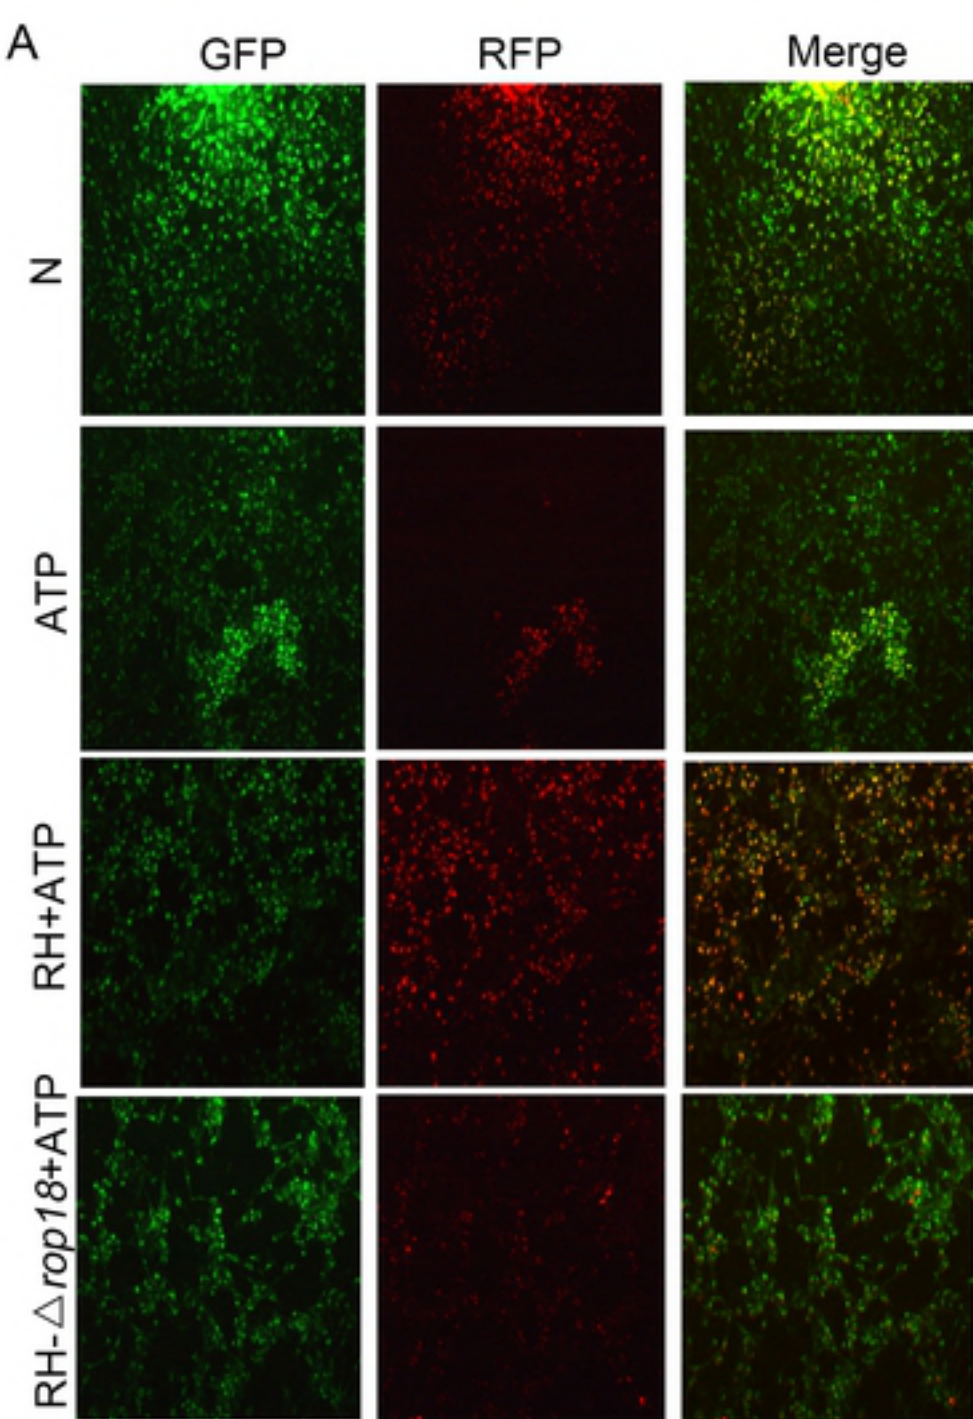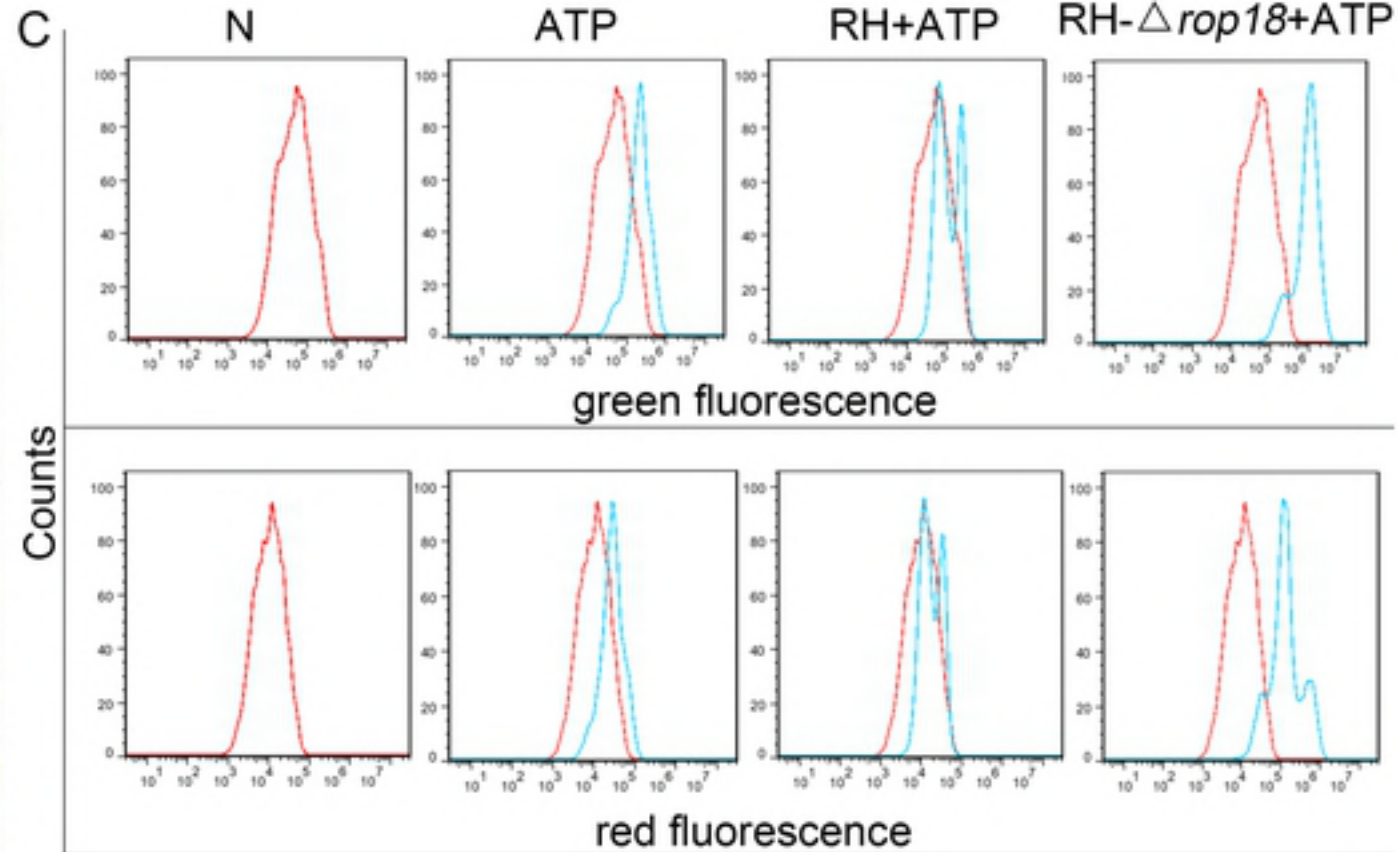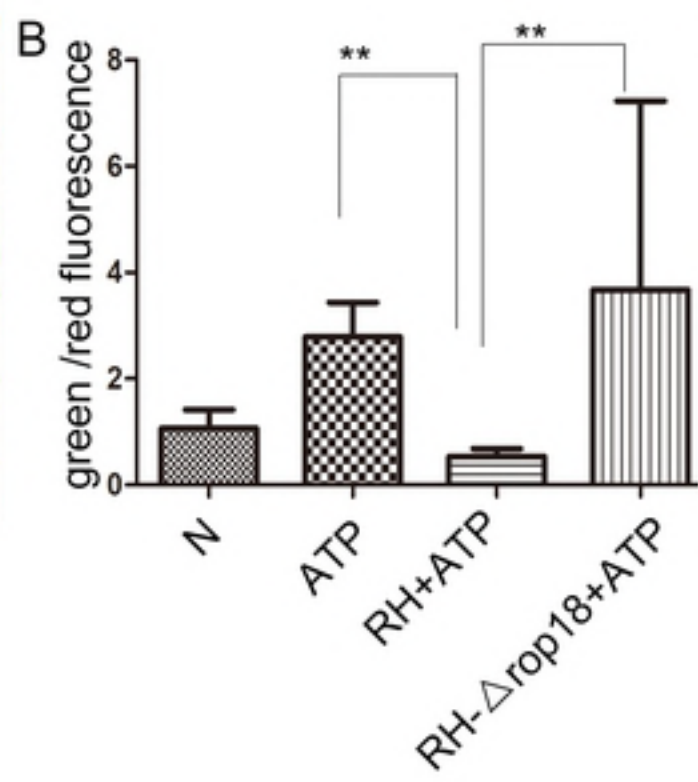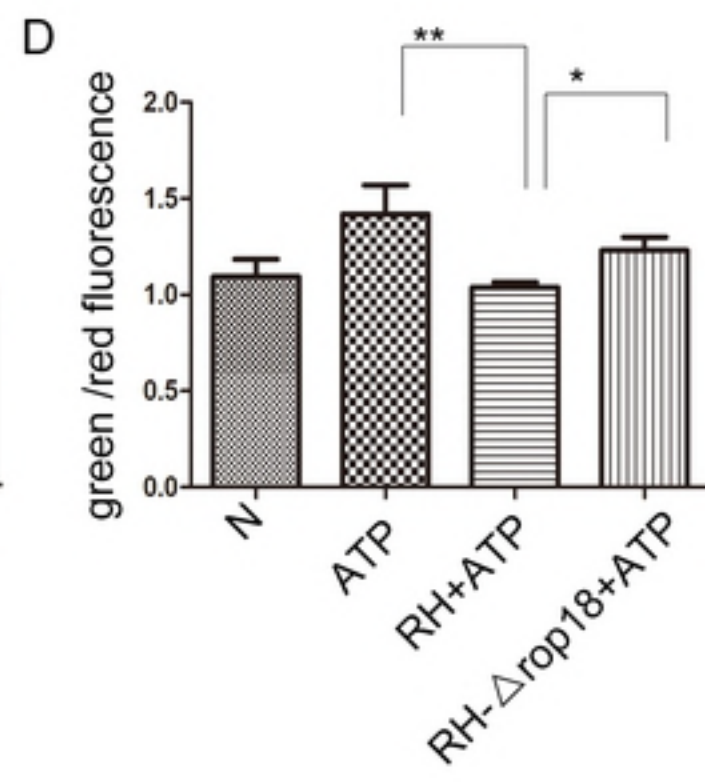

A

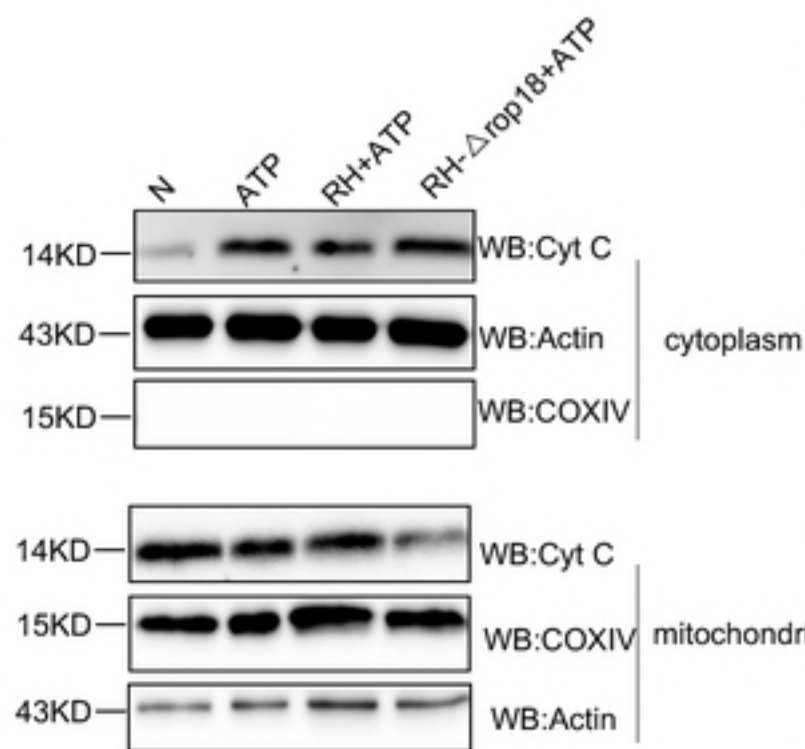

B

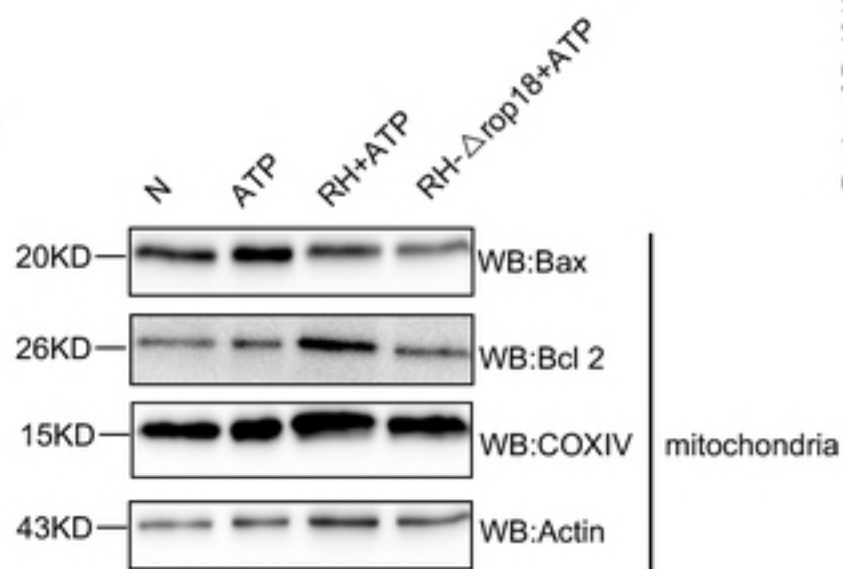

C1

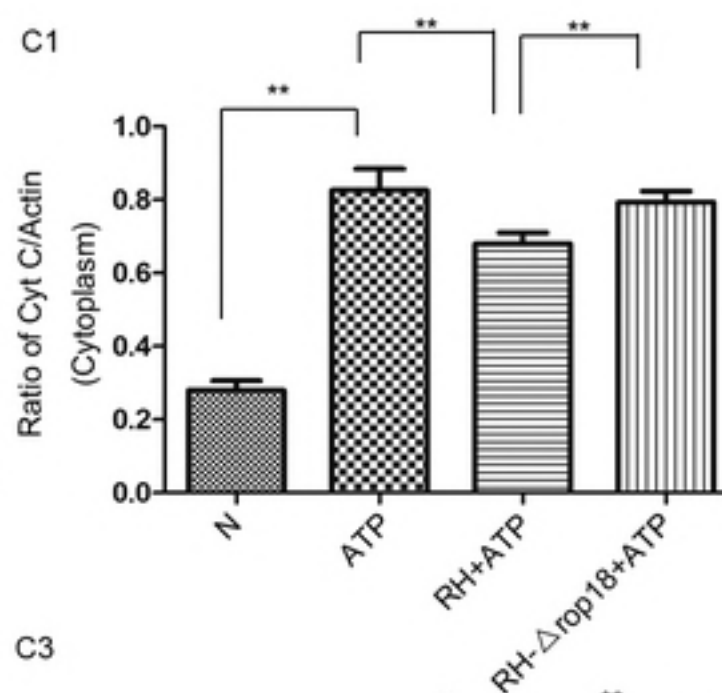

C2

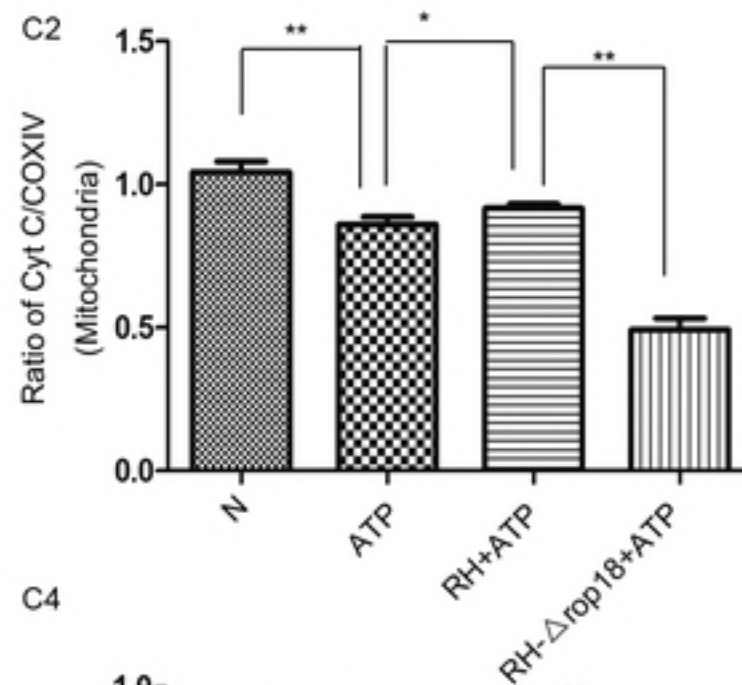

C3

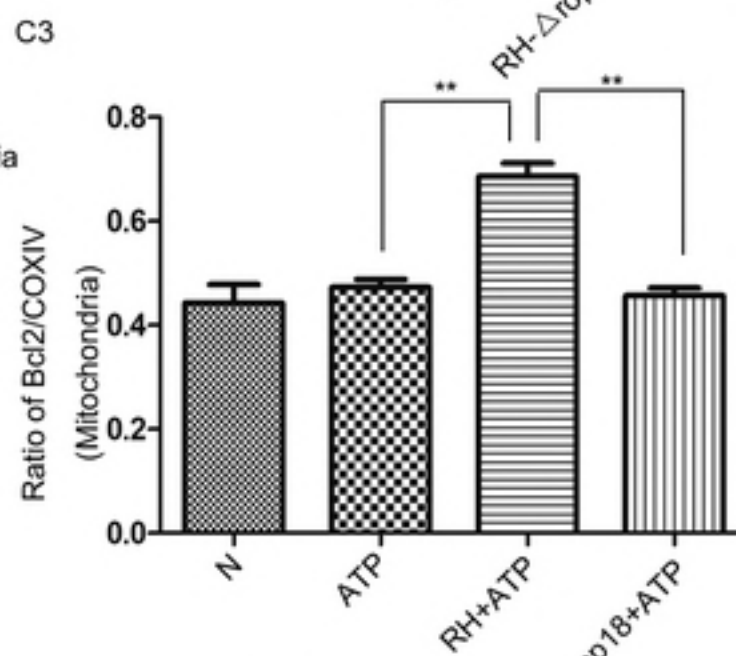

C4

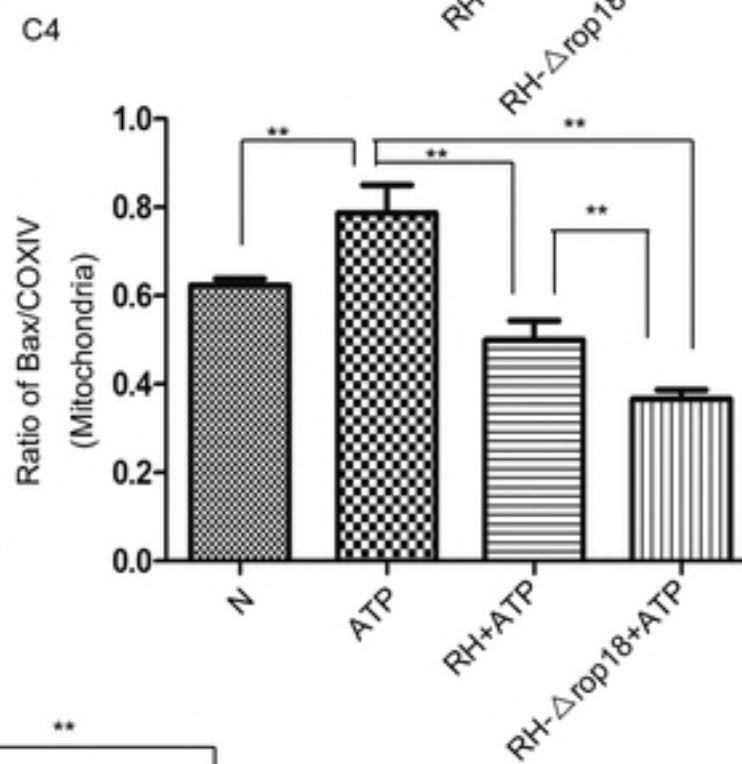

C5

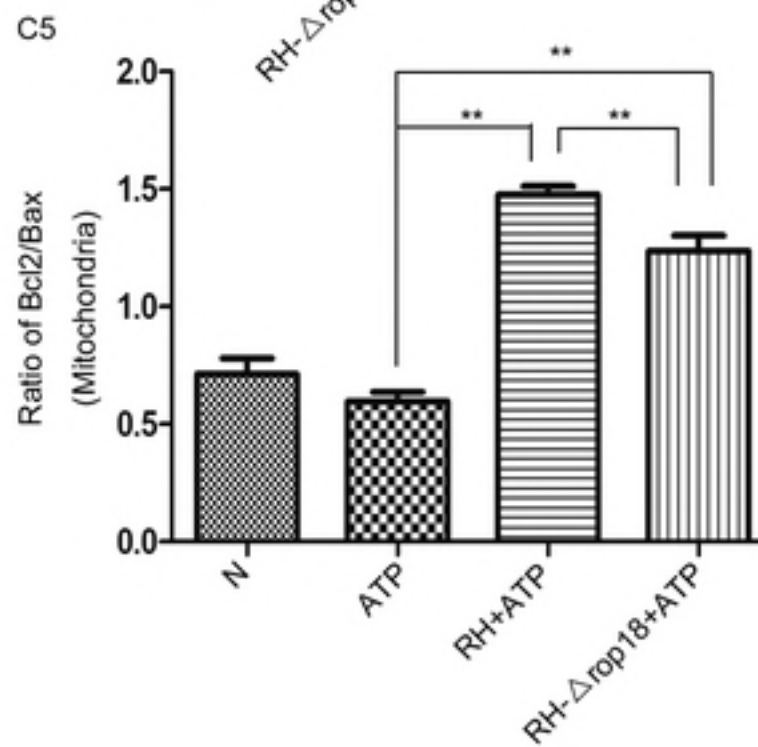

A

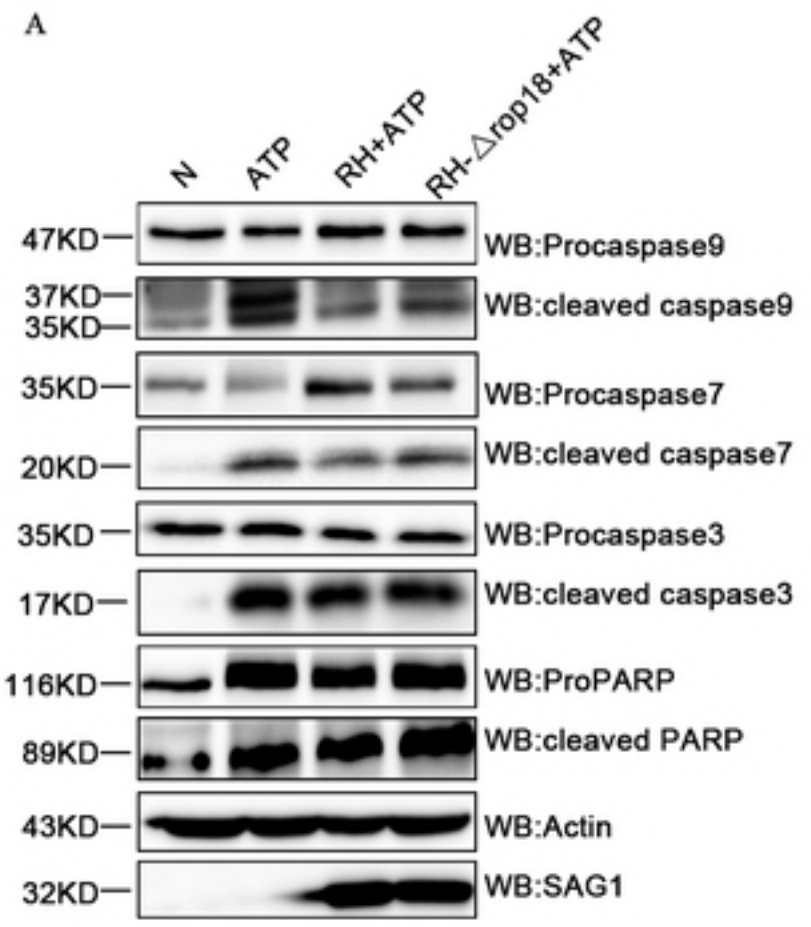

B1

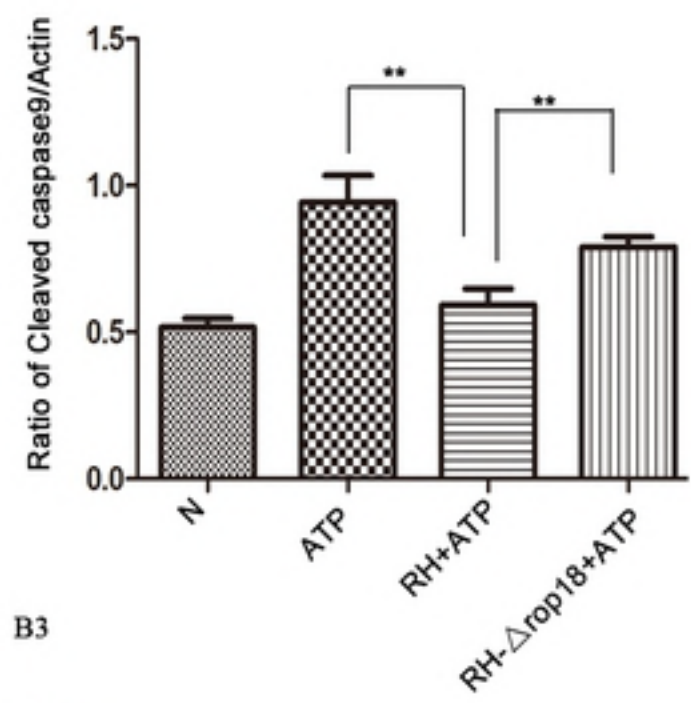

B2

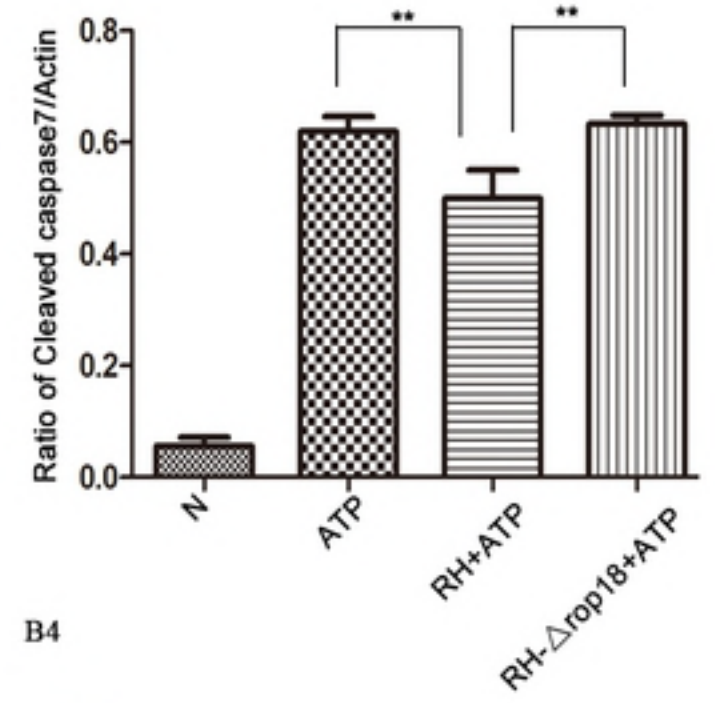

B3

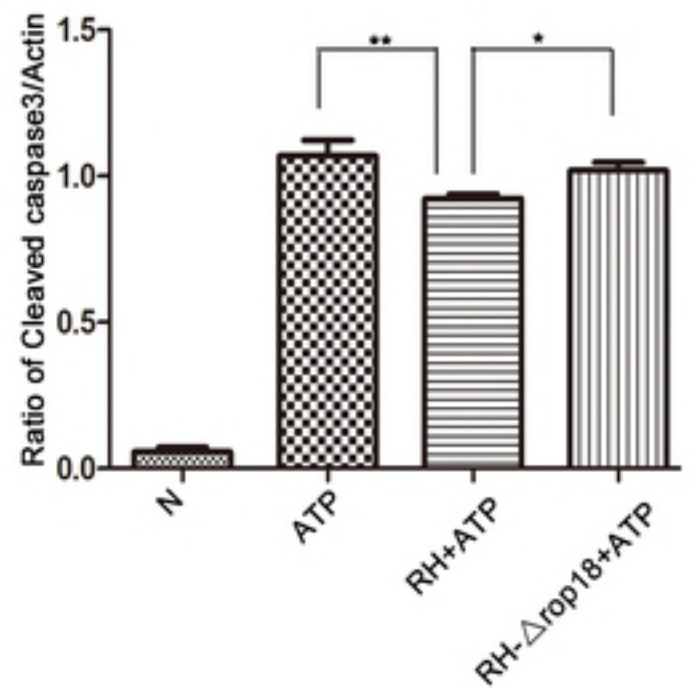

B4

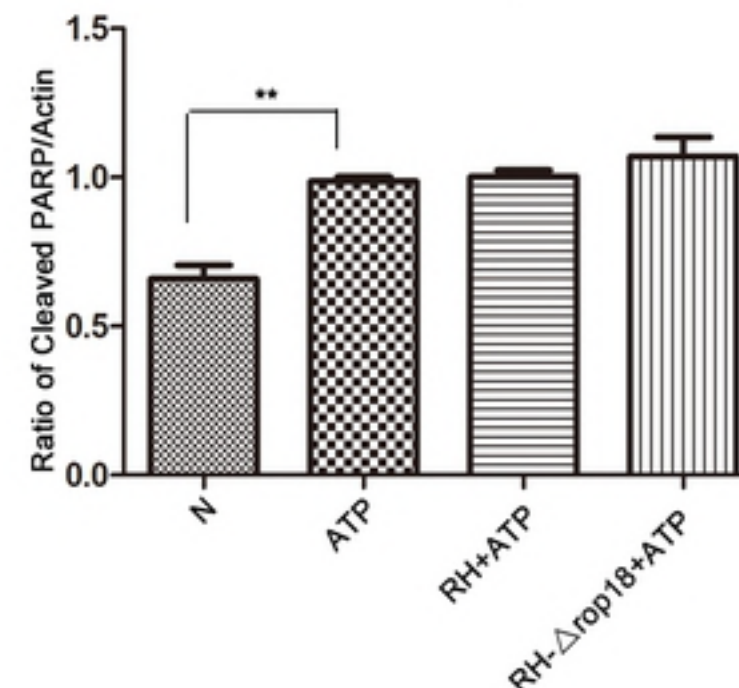

Source: https://www.biorxiv.org/content/10.1101/383638v1.full.pdf
